1 **Classification:**

2 Biophysics and computational biology; Evolution

3

4 **Title:**

5 **Biophysical principles of choanoflagellate self-organization**

6

7 **Authors:**

8 Ben T. Larson<sup>1,2</sup>, Teresa Ruiz-Herrero<sup>3</sup>, Stacey Lee<sup>4</sup>, Sanjay Kumar<sup>4,5</sup>, L.

9 Mahadevan<sup>3,6\*</sup>, Nicole King<sup>1\*</sup>

10

11 **Affiliations:**

12 <sup>1</sup>Howard Hughes Medical Institute and the Department of Molecular and Cell

13 Biology, University of California, Berkeley, CA, USA

14 <sup>2</sup>Biophysics Graduate Group, University of California, Berkeley, CA, USA

15 <sup>3</sup>Paulson School of Engineering and Applied Sciences, Harvard University,

16 Cambridge, MA, USA

17 <sup>4</sup>UC Berkeley-UCSF Graduate Program in Bioengineering, Department of

18 Bioengineering, University of California, Berkeley, CA, USA

19 <sup>5</sup>Department of Chemical and Biomolecular Engineering, University of California,

20 Berkeley, CA, USA

21 <sup>6</sup>Departments of Physics and Organismic and Evolutionary Biology, and Kavli

22 Institute for NanoBio Science and Technology, Harvard University, Cambridge, MA,

23 USA

24 \*Corresponding author. Email: [nking@berkeley.edu](mailto:nking@berkeley.edu) and [lmahadev@g.harvard.edu](mailto:lmahadev@g.harvard.edu)

25

26 **Keywords:**

27 morphogenesis, multicellularity, quantitative microscopy, physical constraints,

28 extracellular matrix, morphospace

29 **Abstract**

30 Inspired by the patterns of multicellularity in choanoflagellates, the closest living  
31 relatives of animals, we quantify the biophysical processes underlying the  
32 morphogenesis of rosette colonies in the choanoflagellate *Salpingoeca rosetta*. We  
33 find that rosettes reproducibly transition from an early stage of 2D growth to a later  
34 stage of 3D growth, despite the underlying stochasticity of the cell lineages. We  
35 postulate that the extracellular matrix (ECM) exerts a physical constraint on the  
36 packing of proliferating cells, thereby sculpting rosette morphogenesis. Our  
37 perturbative experiments coupled with biophysical simulations demonstrates the  
38 fundamental importance of a basally-secreted ECM for rosette morphogenesis. In  
39 addition, this yields a morphospace for the shapes of these multicellular colonies,  
40 consistent with observations of a range of choanoflagellates. Overall, our biophysical  
41 perspective on rosette development complements previous genetic perspectives  
42 and thus helps illuminate the interplay between cell biology and physics in  
43 regulating morphogenesis.

44 **Significance statement**

45 Comparisons among animals and their closest living relatives, the choanoflagellates,  
46 have begun to shed light on the origin of animal multicellularity and development.  
47 Here we complement previous genetic perspectives on this process by focusing on  
48 the biophysical principles underlying colony morphology and morphogenesis. Our  
49 study reveals the crucial role of the extracellular matrix in shaping the colonies and  
50 leads to a phase diagram that delineates the range of morphologies as a function of  
51 the biophysical mechanisms at play.

## 52 **Introduction**

53           Nearly all animals start life as a single cell (the zygote) that, through cell  
54 division, cell differentiation, and morphogenesis, gives rise to a complex  
55 multicellular adult form (1, 2). These processes in animals require regulated  
56 interplay between active cellular processes and physical constraints (3–9). A  
57 particularly interesting system in which to study this interplay is the  
58 choanoflagellates, the closest relatives of animals (10–12). Choanoflagellates are  
59 aquatic microbial eukaryotes whose cells bear a diagnostic “collar complex”  
60 composed of an apical flagellum surrounded by an actin-filled collar of microvilli  
61 (13, 14) (Fig. 1). The life histories of many choanoflagellates involve transient  
62 differentiation into diverse cell types and morphologies (15, 16). For example, in the  
63 model choanoflagellate *Salpingoeca rosetta*, solitary cells develop into multicellular  
64 colonies through serial rounds of cell division (17), akin to the process by which  
65 animal embryos develop from a zygote (Fig. 1A). Therefore, choanoflagellate colony  
66 morphogenesis presents a simple, phylogenetically-relevant system for  
67 investigating multicellular morphogenesis from both a biological and a physical  
68 perspective (14).

69           *S. rosetta* forms planktonic rosette-shaped colonies (“rosettes”), in which the  
70 cells are tightly packed into a rough sphere that resembles a morula-stage animal  
71 embryo (17). Because the cell division furrow forms along the apical-basal axis,  
72 thereby dissecting the collar, all of the cells in rosettes are oriented with their  
73 flagella and collars facing out into the environment and their basal poles facing into  
74 the rosette interior (Fig. 1B). Interestingly, all three genes known to be required for

75 rosette development are regulators of the extracellular matrix (ECM): a C-type lectin  
76 called *rosetteless* (18) and two predicted glycosyltransferases called *jumble* and  
77 *couscous* (19). Nonetheless, little is known about either the mechanistic role of the  
78 ECM or the extent to which rosette morphogenesis is shaped by physical  
79 constraints.

80         A critical barrier to understanding the biological and physical mechanisms  
81 underlying rosette morphogenesis has been the absence of a detailed  
82 characterization of the morphogenetic process. For example, it is not known  
83 whether rosettes form through the development of invariant cell lineages akin to  
84 those seen in *C. elegans* (20) or through stochastic cell divisions, as occurs, for  
85 example, in sponges and mice (21, 22). Moreover, it is not known whether there are  
86 identifiable developmental stages in rosette development. To quantify the principles  
87 of rosette morphogenesis, we used a combination of quantitative descriptions of  
88 rosette development, experimental perturbations, and biophysical simulations that  
89 together reveal the importance of the regulated secretion of basal ECM in physically  
90 constraining proliferating cells and thereby sculpting choanoflagellate  
91 multicellularity.

92

## 93 **Results**

### 94 ***Rosette morphogenesis displays a stereotyped transition from 2D to 3D growth***

95 To constrain our search for mechanistic principles, we first quantified the  
96 range of sizes and spectrum of morphologies of *S. rosetta* rosettes by measuring the  
97 population-wide distribution of rosette size in terms of cell number. *S. rosetta*  
98 cultured solely in the presence of the rosette-inducing bacterium *A.*  
99 *machipongonensis* (23), lead to a population with a stationary cell number  
100 distribution. While some rosettes contained as many as 25 cells, the most common  
101 rosette size was 8 cells/rosette, with 51% of rosettes containing between 6-8 cells  
102 (Fig. 2A). While rosettes grow through cell division, their ultimate size is  
103 determined by either colony fission (as previously reported; 16) or cell extrusion  
104 (Fig S1). In each case, the rosettes contained 8 or more cells, suggesting that these  
105 rosette size decreasing phenomena are more common in larger rosettes.

106 We next quantified defining features of the 3D morphology of rosettes  
107 containing between four (following (24), we defined four cells as the smallest cell  
108 number clearly identifiable as a rosette) to twelve cells (representing 90% of  
109 rosettes at steady state, Methods; Fig. 2B, C). This analysis revealed that rosettes  
110 increased in volume and diameter as cell number increased (Fig. 2D). Although the  
111 average cell volume reduced between the four-cell and five-cell stages of rosette  
112 development, average cell volume did not change substantially with increasing cell  
113 number after the five-cell stage (Fig. S2), suggesting that cells in rosettes grow  
114 between cell divisions. This contrasts with cleavage in the earliest stages of animal

115 embryogenesis, in which cell volume steadily decreases as cell divisions proceed  
116 with no cell or overall tissue growth (2).

117 Our analyses revealed that rosette morphogenesis displays two distinct, but  
118 previously undescribed phases: (1) a 2D phase of growth from four to seven cells,  
119 during which the overall shape of rosettes changed substantially with increasing cell  
120 number and (2) a 3D phase from eight to twelve cells, during which rosettes  
121 expanded nearly isotropically (Fig. 2C-E). Interestingly, the most common rosette  
122 size (8 cells) corresponded to the transition between the two phases of growth.

123 Transitions from 2D to 3D growth can be driven by the constrained growth  
124 of cell layers leading to increasing mechanical stresses (25–29). We hypothesized  
125 that the physical packing of cells in rosettes might constrain cell growth and  
126 proliferation and help explain the growth transition during rosette morphogenesis.  
127 Indeed, cell packing initially increased (as indicated by an increase in the number of  
128 nearest neighbor cells, Fig. 2F, and suggested by the reduced average sphericity of  
129 cells, Fig. S2). Following the growth transition at the 8-cell stage, cell packing  
130 continued to increase with increasing cells/rosette, although the rate of increase  
131 slowed as a function of the number of cells/rosette (Fig. 2F). Therefore, the  
132 transition to isotropic 3D growth in eight-cell rosettes may occur in response to the  
133 accumulation of stress caused by the increase in cell packing in growing rosettes.

134

### 135 ***Rosette developmental dynamics are stochastic***

136 The influence of cell packing on rosette morphogenesis did not preclude the  
137 possibility that the rosette developmental program might also involve specific

138 patterns of cell division that result in well-defined cell lineages. We therefore  
139 documented cell lineages in live, developing rosettes (Fig. 3). Consistent with the  
140 single previous published observation of live rosette development (17), the cells  
141 maintained polarity throughout development, with their division planes oriented  
142 along the apical-basal axis. Relative to the cell division times in linear chains (Fig.  
143 1A), which form when rosette inducing bacteria are absent, we observed a slight but  
144 statistically significant increase in division rate in rosettes ( $p=0.03$  by Wilcoxon  
145 rank sum test Fig. S3). In addition, we found that both the order and timing of cell  
146 divisions differed among different rosettes (Fig. 3B, C), ruling out the possibility that  
147 cell lineages are invariant. This process of apparently unpatterned cell divisions  
148 resembles the dynamics of early embryogenesis in diverse animals, including  
149 sponges and mice (21, 22).

150         Although division patterns were variable between rosettes, ruling out the  
151 possibility of invariant cell lineages, in no rosette did cells from the first, second, or  
152 third cell division give rise to more than 60% of cells (Fig. 3D). Moreover, cell  
153 division remained balanced throughout rosette morphogenesis, with no cell lineage  
154 coming to dominate. Importantly, the cell lineages of chains showed the same kind  
155 of stochasticity and variability as rosettes (Fig. 3D). These observations suggest that  
156 rosette morphogenesis does not require the strongest forms of cell cycle control or  
157 coordination (i.e. the synchronous divisions or deterministic division timing or  
158 order observed in the development of some animals such as *C. elegans*, *Xenopus*,  
159 *Drosophila*, and zebrafish (30–33) and in the green alga *Volvox* (34–36)).

160



161 ***ECM constrains proliferating cells in rosettes***

162 To reconcile the stereotyped 3D growth transition (Fig. 2) with the stochastic  
163 developmental dynamics of rosette formation (Fig. 3), we set out to test the “ECM  
164 constraint hypothesis (Fig 4A, B).” This hypothesis was motivated by the idea that  
165 physical constraints imposed by the geometry and mechanics of cell packing play a  
166 key role in morphogenesis and that the source of the physical constraint in growing  
167 rosettes is the ECM, which is known to be required for rosette morphogenesis and  
168 connects all cells in a rosette, filling the rosette center (16, 18, 19, 37). The  
169 phenomenon of physically constrained morphogenesis suggests that the amount of  
170 ECM secreted during rosette development is an important factor in sculpting rosette  
171 morphogenesis (Fig. 4A, B). We visualized and quantified the volume of the ECM by  
172 staining with fluorescein-conjugated Jacalin, a galactose-binding lectin (19, 38).  
173 Importantly, Jacalin does not stain chains, so its target is likely specific to rosette  
174 ECM (19). We found that the relative amount of space occupied by basal ECM (ECM  
175 volume/total cell volume, denoted by  $\phi$ ) in developing rosettes was constant and  
176 maintained at roughly 6% (Fig. 4C). Therefore, we infer that cells in rosettes  
177 produce ECM at a constant rate relative to the growth of cells, either through  
178 synthesis and secretion alone or through a balance of regulated synthesis, secretion,  
179 and degradation.

180 A key prediction of the ECM constraint hypothesis (Fig. 4A, B) is that  
181 compressive stress on cells, balanced by stress in the ECM, should increase with cell  
182 number. Alternatively, cell-cell connections mediated by lateral cell-cell adhesion or  
183 cytoplasmic bridges formed during incomplete cytokinesis (16, 37) (Fig. 1B) might

184 be primarily responsible for the structural integrity of rosettes. If cell-cell  
185 connections dominate over ECM in holding together rosettes, we would expect cells  
186 to be under tension such that measured stresses would be in the opposite direction  
187 to those predicted by the ECM constraint hypothesis.

188 To probe the balance of forces in developing rosettes, we performed laser  
189 ablation experiments, which provided a readout of the relative magnitude and  
190 direction of stresses within rosettes (39–42). Upon ablation of a single cell in a  
191 rosette, we found that the remaining cells immediately became more rounded and  
192 moved closer together, reducing the size of the gap left by the ablated cell (Fig. 4E.  
193 This result demonstrated that residual elastic stress (as measured by initial recoil  
194 velocity after ablation, (39)) is maintained in rosettes, with cells under compressive  
195 stress balanced by an additional component of residual stress. If rosettes were  
196 primarily held together by strong cell-cell adhesion or constrained by cytoplasmic  
197 bridges (Fig. 1B), the expected recoil would have been in the opposite direction,  
198 causing a larger gap to open in rosettes, due to cells increasing contact area with  
199 remaining neighbors in the former case and tension in bridges in the latter.  
200 Moreover, as the number of cells in rosettes increased, the measured residual stress  
201 increased (Fig. 4F), consistent with the ECM constraint hypothesis (Fig. 4A, B).  
202 These results ruled out strong cell-cell adhesion or constraint by cytoplasmic  
203 bridges as the dominant physical mechanisms underlying rosette integrity and  
204 morphogenesis.

205 Additionally, residual stress (as measured by initial recoil velocity (7, 39,  
206 43)) displayed a sharp increase, by nearly a factor of two, at the 8-cell stage (Fig.

207 4F), coinciding with the 3D growth transition (Fig. 2). In conjunction with the  
208 observed increase in cell packing (Fig. 2F), this result suggested that the packing of  
209 cells is mechanically constrained in developing rosettes such that cells are  
210 increasingly compressed against one another with increasing cell number. We  
211 reasoned that the shared ECM secreted from the basal end of cells, adhesion to  
212 which is likely essential for rosette formation (18, 19), might be the source of this  
213 constraint. While we have ruled out bridges as a dominant component of the  
214 structural integrity of rosettes, they could play a role in stabilizing cell orientation to  
215 hinder out of plane growth during the 2D phase of rosette morphogenesis.

216

### 217 ***Material properties of ECM affect morphogenesis***

218 We next sought to test the ECM constraint hypothesis through perturbative  
219 experiments. While the hypothesis entails that changing geometrical properties  
220 such as cell shape and relative amount of ECM should have a substantial effect on  
221 rosette morphogenesis, these properties could not be experimentally tuned.  
222 However, we could perturb the mechanical properties of the ECM. To do so, we  
223 treated developing rosettes with strontium chloride ( $\text{SrCl}_2$ ). Strontium is a divalent  
224 cation that can stiffen hydrogels, including animal ECM, by increasing crosslinking  
225 density (44–48). Importantly, we found that  $\text{SrCl}_2$  has no detectable effect on cell  
226 growth at up to twice the highest concentration used during this set of experiments  
227 (Fig. S4). Under our ECM constraint hypothesis, we predicted that increased ECM  
228 stiffness would alter morphogenesis by further constraining cell packing, thus  
229 holding cells in a more compact arrangement along with a relative increase in

230 residual stress. Consistent with our hypothesis, we found that rosettes became more  
231 compact with increasing SrCl<sub>2</sub> concentration (Fig. 5A, B), and the 3D transition  
232 shifted to lower cell numbers, occurring at the five-cell stage for the highest SrCl<sub>2</sub>  
233 concentration (Fig. 5C). Additionally, the transition to isotropic growth at the 8-cell  
234 stage was abolished (Fig. 5B). Together, these analyses reveal that morphogenesis is  
235 altered.

236         Using laser ablation experiments, we found that relative residual stress as  
237 determined by maximum initial recoil velocity (as in Fig. 4E, F) was significantly  
238 increased for SrCl<sub>2</sub>-treated 4-7 cell rosettes relative to untreated rosettes (Fig. 5D).  
239 The increase in residual stress in conjunction with the 2D to 3D growth transition at  
240 lower cell numbers, supported the hypothesis that ECM-constrained proliferation is  
241 a key driver of the 3D transition in rosette morphogenesis. Interestingly, for the 8-  
242 cell-stage and higher, we did not find a significant increase in residual stress in  
243 SrCl<sub>2</sub>-treated rosettes compared to untreated rosettes. This is consistent with cells  
244 exerting maximum growth pressure on their neighbors at the 8-cell stage and above.  
245 Taken together, these results confirm important model predictions by  
246 demonstrating that material properties of the ECM can affect morphogenesis, which  
247 highlights the central role of the ECM in sculpting rosette morphology.

248

249 ***Amount of ECM, cell shape, and ECM stiffness as control parameters for***  
250 ***morphogenesis***

251         To formalize and test our hypothesis of morphogenesis shaped by ECM  
252 constraint (Fig. 4A, B), we next developed a cell-based computational model to

253 simulate rosette development. Because development involves few cells (ruling out  
254 continuum modeling) in a low Reynolds number environment where inertial forces  
255 play a negligible role (49, 50) we developed particle-based simulations akin to  
256 Brownian dynamics, but neglected the role of thermal fluctuations given the large  
257 size of the cells and aggregates (51). In the model, the ECM and cells were  
258 represented by a system of interacting spherical particles (Fig. 6A). This particle  
259 representation also allowed us to capture the discrete and stochastic nature of cell  
260 division and the stochastic nature ECM secretion as well the polarity of cell division  
261 and ECM secretion. Each cell in the model was composed of three linked spheres to  
262 capture cell shape and for computational tractability, with a small sphere  
263 representing the basal pole of the cell, a larger sphere representing the cell body,  
264 and the largest representing the collar exclusion region. Cells interacted sterically  
265 with one another. The ECM was modelled as a system of small spheres with  
266 attractive interactions in order to capture the complex shapes the ECM can take on  
267 (Fig 4C) as well as its deformability. ECM particles similarly shared attractive  
268 interactions with the basal poles of cells. Cells in the model were allowed to divide  
269 stochastically, with the division plane orientation around the apico-basal axis  
270 determined by the previous division (consistent with observations of rosette  
271 development from Fig. 3 and (17)), and ECM particles were secreted stochastically  
272 at a constant rate from the basal pole of non-dividing cells (see Methods for a more  
273 detailed description of the model and simulations).

274 In this simplified model of rosette morphogenesis, three main parameters  
275 characterized the system: cell aspect ratio (length along apical/basal axis vs.

276 equatorial diameter),  $\alpha$ , amount of ECM relative to total cell volume,  $\phi$ , and relative  
277 stiffness of the ECM (in terms of the strength of ECM-ECM adhesion bonds relative  
278 to the force exerted by growing and dividing cells),  $\sigma$ . Simulations with parameter  
279 values constrained by cell and ECM morphology data collected as part of this study  
280 showed that this simple model was sufficient to recapitulate rosette morphogenesis,  
281 including the expected 3D transition at the 8-cell stage (Fig. S5). Furthermore,  
282 simulations showed that rosette morphogenesis was robust to a range of scaled  
283 ECM stiffness values (Fig. 6B-E, S5) and to the stochasticity of cell divisions (Fig. S5).  
284 We did find that simulations fail to recapitulate all aspects of rosette  
285 morphogenesis, most saliently, the growth scaling (Fig. 2D) and the absolute  
286 magnitudes of flatness and sphericity (Fig. 2E, S5). We expect, however, that a more  
287 detailed treatment of the mechanics of cells and ECM may capture these aspects of  
288 rosette morphogenesis more accurately, but such a detailed model is beyond the  
289 scope of the present study.

290       Exploration of the effects of different parameter values revealed that the  
291 model captures a range of different colonial morphologies (Fig. 6B, F). This space of  
292 forms and associated model parameters constitutes a theoretical morphospace (51)  
293 of ECM-based colonial choanoflagellate morphologies given this simplified model of  
294 morphogenesis. Interestingly, some of the simulated forms resembled colonies, such  
295 as tree-like structures (found in *Codosiga cymosa* (52) and an uncharacterized  
296 *Salpingoeca sp.*, Fig. 6Gt<sub>2</sub>, t<sub>3</sub>) or cups (found in *Codosiga umbellata* (53) and another  
297 uncharacterized *Salpingoeca sp.*, Fig. 6Gc<sub>4</sub>, c<sub>5</sub>), that have been previously reported in  
298 other choanoflagellate species (Fig. 6F, G). We found that colony morphogenesis is

299 particularly sensitive to  $\alpha$  and  $\phi$ , changes in each of which can lead to dramatic  
300 changes in predicted multicellular forms. For example, holding the other two  
301 parameters fixed, increase in  $\phi$  alone would be predicted to drive a change from  
302 rosettes to disks or cups and from cones to trees (Fig. 6C, D). Colony morphogenesis  
303 was also affected by changes in  $\sigma$ , but the effects tended to be subtler, such as  
304 changes in cell packing over a relatively wide range of values (Fig. S5). In contrast  
305 with changes in  $\phi$ , increase in  $\sigma$  alone was either not predicted to lead to any  
306 transitions in predicted colony morphology type or, at most, lead to single  
307 transitions such as from rosettes to disks (Fig. 6D, E). These results demonstrate  
308 that basal secretion of a shared ECM constitutes a robust yet flexible mechanism for  
309 regulating multicellular morphogenesis. Furthermore, these results made specific  
310 predictions about different colony morphologies corresponding to specific cell  
311 morphologies and relative ECM volumes and stiffnesses.

312

## 313 **Discussion**

314           Our quantitative analyses, experimental perturbations, and simulations  
315 allowed us to understand the process by which single cells of *S. rosetta* gives rise to  
316 multicellular rosettes. We found that the earliest stages of rosette morphogenesis  
317 proceed through 2D anisotropic growth, which is stereotypically followed by a  
318 transition to 3D isotropic growth. In particular, we found that the basal ECM  
319 secreted by cells during rosette development physically constrains proliferating  
320 cells, and thereby drives a stereotyped morphogenetic progression in the absence of  
321 strict cell lineage specification and division timing. Simulations showed that this  
322 simple mechanism, the regulated basal secretion of ECM, is sufficient to not only  
323 recapitulate rosette morphogenesis but yield a morphospace that can not only  
324 explain the multicellular morphology of *S. rosetta* but also that of other species of  
325 colonial choanoflagellates. These results emphasize the importance of the  
326 choanoflagellate ECM for morphogenesis and should encourage future studies of its  
327 composition, physical properties, and regulation.

328           The importance of the basal ECM revealed in this study may generalize to  
329 other choanoflagellate species and colonial morphologies. Our simulations predict  
330 that differences in ECM levels (resulting from differing rates of biosynthesis,  
331 secretion, or degradation), cell shape, and in ECM stiffness relative to cells are  
332 sufficient to explain the existence of radically different colony morphologies across  
333 diverse choanoflagellates. Measurements and comparisons of ECM levels ( $\phi$ ), cell  
334 shape ( $\alpha$ ), and ECM stiffness ( $\sigma$ ), in diverse colonial choanoflagellates will be crucial



335 to validate the model, and deviations from the predictions of the model could point  
336 to additional regulatory mechanisms.

337 From a broader perspective, rosette morphogenesis shows interesting  
338 parallels to mechanisms underlying morphogenesis in diverse other taxa. In terms  
339 of physical mechanisms, the constrained proliferation of cells that occurs during  
340 rosette development generates crowding stresses like those that regulate  
341 morphogenesis by animal epithelia (54, 55), snowflake yeast (56), and bacterial  
342 biofilms (26). In epithelia, compaction of cells due to crowding has been proposed as  
343 a general signal for cellular processes underlying tissue homeostasis such as  
344 apoptosis and extrusion (57–60). Further, accumulation of stress due to crowding  
345 of cells produces a jamming-like behavior that has been proposed as a generic  
346 constraint on the development of multicellular systems with fixed cell geometry  
347 (56). Due to the generality of physical constraints on cell packing, it is plausible that  
348 such phenomena acted both as constraints and regulatory mechanisms in the  
349 development and morphogenesis of early animals and their ancestors.

350 Cellular mechanisms of rosette morphogenesis are also shared with other  
351 multicellular systems. Our results demonstrate that the regulation of basal ECM  
352 sculpts the multicellular morphology of rosettes. Thus, our biophysical studies have  
353 converged on results from genetic screens in *S. rosetta* that implicated animal ECM  
354 gene homologs in the regulation of rosette development, including a C-type lectin  
355 (18) and predicted glycosyltransferases (19). The basal ECM of rosettes is  
356 reminiscent of the basal lamina, a basally secreted layer of ECM that underpins  
357 animal epithelia and regulates tissue morphogenesis by constraining cell

358 proliferation (29) including in *Drosophila* wing and egg chamber development (54,  
359 61, 62), branching growth during lung and salivary gland development (63, 64),  
360 notochord expansion (65), lumen elongation (66), and in tumor growth in  
361 mammary epithelia (45). The ECM also sculpts morphogenesis in *Volvox*, in which  
362 defects in ECM composition disrupt morphogenesis (67, 68), and in bacterial  
363 biofilms, in which the ECM can constrain cells and thereby drive 3D morphogenesis  
364 (26, 69). Remarkably, some bacteria form multicellular rosettes in a process that is  
365 mediated by basal ECM secretion (70, 71).

366           Altogether, the principles that we can glean from the simplicity of  
367 choanoflagellate morphogenesis holds the promise of revealing general principles  
368 by which biological and physical mechanisms shape morphogenesis more broadly.

369 **Methods**

370 ***Choanoflagellate strains and culture***

371 Two strains of *S. rosetta* were used for the experiments in this study: one  
372 grown solely in the presence of the non-rosette inducing bacterium *Echinicola*  
373 *pacifica* (72), a strain called SrEpac (73) and the other grown solely in the presence  
374 of the rosette inducing bacterium *Algoriphagus machipongonensis* (74), a strain  
375 called PX1 (23, 75).

376 SrEpac was grown in 5% Sea Water Complete (SWC) media at 22°C. Sea Water  
377 Complete media consisted of 250 mg/L peptone, 150 mg/L yeast extract, 150µL/L  
378 glycerol in artificial sea water and was diluted to 5% by volume in artificial sea  
379 water to make 5% Sea Water Complete media. Artificial sea water (ASW) consisted  
380 of 32.9 g Tropic Marin sea salts (Wartenberg, Germany) dissolved in 1L distilled  
381 water for a final salinity of 32-27 parts per thousand. SrEpac was passaged either  
382 1:10 into 9mL fresh 5% SWC once a day or 1:20 every other day into 9mL fresh 5%  
383 SWC to stimulate rapid proliferation and maintain log-phase growth. Cells were  
384 grown in 25cm<sup>2</sup> cell culture flask (Corning).

385 PX1 was grown in 25% Cereal Grass media (CGM3) at 22°C. Cereal Grass media  
386 consisted of Cereal Grass (Basic Science Supplies) added to ASW at 5g/L, steeped for  
387 3.5 hours and then filtered. This media was then diluted to 5% by volume in ASW in  
388 order to make 25% CGM3. PX1 was passaged 1:5 into 9mL of fresh 25% CGM3 every  
389 two to three days to stimulate rapid proliferation and maintain log-phase growth.  
390 Cells were grown in 25cm<sup>2</sup> cell culture flask (Corning).

391

392 ***Rosette induction***

393 Rosette development from single cells was stimulated by the addition of  
394 outer membrane vesicles (OMVs) isolated from *Algoriphagus* bacteria (23) to  
395 SrEpac cultures. To isolate OMVs, *Algoriphagus* was first grown in 200mL of SWC at  
396 30°C for 48 hrs. on a shaker. Bacterial cells were then pelleted, and the cell free  
397 supernatant was sterile filtered, then spun at 36,000 x g for three hours at 4°C (Type  
398 45 Ti rotor, Beckman Coulter) to pellet OMVs. Finally, OMVs were resuspended in  
399 1.5 mL ASW. To induce rosette development, OMVs were added to SrEpac at a  
400 concentration of 1:2000 by volume. This concentration led to >90% of cells in  
401 rosettes by 48 hrs. post-induction.

402

403 ***Electron microscopy***

404 *Algoriphagus* OMV induced SrEPac cultures (48 hours post-induction) were  
405 concentrated by centrifugation (1200xg for 5 min). Colonies were resuspended in  
406 5% BSA in ASW, high pressure frozen using a Leica EM PACT2, and fixed by freeze  
407 substitution in 0.01% OsO<sub>4</sub> + 0.2% uranyl acetate in acetone (76). Samples were  
408 resin embedded in Epon Araldite (Embed-812) (77), cut into 80 nm sections, and  
409 then imaged using an FEI Tecnai 12 transmission electron microscope.

410

411 ***Rosette cell number quantification***

412 Rosettes from rapidly growing PX1 cultures (*S. rosetta* co-cultured with  
413 *Algoriphagus*) were concentrated to 5x by centrifugation (1500xg for 10 min) and  
414 resuspended by vigorous pipetting in fresh 25% CGM3 media. Rosettes were then

415 gently adhered to a poly-D-lysine coated coverslip (FluoroDish, World Precision  
416 Instruments, Inc), which had been washed three times using 25% CGM3. Rosettes  
417 were observed using a Leica DMIL microscope with a 20x objective (Leica, N Plan,  
418 0.35 NA), and cells were manually counted. In general, rosettes were not  
419 overlapping, and cells were deemed to belong to a rosette when oriented radially  
420 outward about a central focus.

421

### 422 ***Quantitative morphology analysis pipeline***

423 For morphological analysis of rosettes, SrEpac cultures were first induced to  
424 form rosettes as described above. After 24 hours, developing rosettes were pelleted  
425 by centrifugation (1500xg for 10 min) and resuspended in fresh ASW by vigorous  
426 pipetting in order to minimize bacteria and to break apart any chains that might be  
427 mistaken for rosettes. Rosettes were then deposited onto a poly-D-lysine coated  
428 coverslip (FluoroDish, World Precision Instruments, Inc), which had been washed  
429 three times using ASW. Rosettes were stained by overloading with LysoTracker Red  
430 DND-99 (ThermoFisher Scientific) at 1:200 dilution, which reliably stains the entire  
431 cell body. Next, z-stack images of stained rosettes were acquired on a Zeiss 880 laser  
432 scanning confocal microscope using a 40x water immersion objective (Zeiss, C-  
433 Apochromat, 1.2 NA) and illumination with a 561 nm laser (Zeiss). Importantly,  
434 pure water, and not water immersion oil, was used to minimize coverslip deflection  
435 during imaging.

436 After image acquisition, z-stacks were registered using the Stackreg plugin in  
437 FIJI (78, 79). Aligned z-stacks were deconvolved using the Parallel Iterative

438 Deconvolution v1.12 plugin in FIJI (78, 79). For deconvolution, the Wiener Filter  
439 Preconditioned Landweber method (WPL) with stock settings and a theoretical  
440 pointspread function for the imaging system generated using the Diffraction PSF 3D  
441 plugin in FIJI (78, 79) were used. Aligned, deconvolved z-stacks were then  
442 segmented using Imaris v3.8 (Bitplane, Belfast). First, the images were median  
443 filtered with a 3x3x1 kernel and smoothed using a Gaussian filter with a sigma of  
444 0.24 microns. Intensity thresholds for local intensity segmentation and thresholds  
445 for size and shape filters to exclude extraneous objects such as bacteria within the  
446 analysis region were then chosen based on segmentation of a few rosettes from each  
447 sample and then kept the same for all rosettes in the sample. Individual cells in  
448 rosettes were segmented using the Split Touching Objects option. Segmentation of  
449 each rosette was manually inspected, and any improperly segmented cells were  
450 manually split and fused as necessary. Statistics of segmented rosettes, including  
451 number of cells, cell positions, orientations, sizes, and shapes were exported to  
452 MATLAB release 2016a (Mathworks, Natick) for additional morphological analysis.

453 Rosette volume was measured by determining the convex hull of cell  
454 positions. Maximum rosette width was measured by the maximum distance  
455 between cells in rosettes. To further evaluate rosette morphology, principle axes of  
456 rosettes were determined by principle components analysis of cell positions.  
457 Flatness ( $F$ ) and Sphericity ( $S$ ) of rosettes were computed from these principle  
458 components where  $F = 1 - C/B$ , and  $S = \sqrt[3]{BC/A^2}$  where  $A$ ,  $B$ , and  $C$  are the  
459 principle axes in descending order of magnitude. The packing of cells was then  
460 quantified by the average number of neighboring cells over all cells in rosettes as

461 determined by a Voronoi tessellation (80) of cell positions. Finally, rosettes were  
462 then binned by cell number for the final analysis of morphological progression.

463

#### 464 ***Cell lineage analysis***

465 Rapidly growing SrEpac cultures were induced to form rosettes, and 9 hours  
466 post induction, induced cells were concentrated to 5x by centrifugation and  
467 resuspension in 5% SWC (1200xg for 5 min, initial volume 15mL resuspended in  
468 3mL) and then deposited in a 200  $\mu$ L droplet on a poly-D-lysine coated coverslip  
469 (FluoroDish, World Precision Instruments, Inc). Cells were imaged in phase contrast  
470 or DIC on either a Zeiss Axio Observer Z1 with a 20x (Zeiss, Plan-Apochromat, 0.8  
471 NA) objective or a Leica DMI6000B with a 20x (Leica, Plan-Apochromat, 0.7 NA)  
472 objective at 1 frame/minute for 16 hours. Cell positions were tracked using the  
473 Manual Tracking plugin in FIJI (78, 79), and division events were tracked and  
474 recorded manually. For analysis of chain cell lineages, the cells were not induced to  
475 form rosettes, but otherwise all previous steps were followed.

476

#### 477 ***ECM measurements***

478 Rosettes were prepared as in the “Quantitative morphology analysis  
479 pipeline” section (QMAP). Additionally, to label the ECM, fluorescein labeled Jacalin  
480 (Vector Labs, FL-1151) at a 1:400 dilution was added to the concentrated rosettes.  
481 Imaging also followed the QMAP with additional sequential illumination with a 488  
482 nm laser to excite the fluorescein. Z-stack images were processed and analyzed

483 following QMAP with the exception of post-processing in MATLAB, as cell and ECM  
484 volumes were exported directly from Imaris.

485

#### 486 ***Laser ablation***

487 For laser ablation, an upright Olympus BX51WI microscope (Olympus  
488 Corporation) equipped with Swept Field Confocal Technology (Bruker) and a  
489 Ti:Sapphire 2-photon Chameleon Ultra II laser (Coherent) were used. The 2-photon  
490 laser was set to 770 nm and ablation was performed using three 20 ms pulses. A 60x  
491 water dipping objective (Olympus, LUMPlanFL N, 1.0 NA) was used for imaging.  
492 Images were captured using an EM-CCD camera (Photometrics). The following  
493 emission filter was used: Quad FF-01-446/523/600/677-25 (Semrock). PrairieView  
494 Software (v. 5.3 U3, Bruker) was used to acquire images.

495 Rosettes were gently adhered to a coverslip using poly-D-lysine and stained  
496 with lysotracker (as described above). Individual cells in rosettes were ablated, and  
497 the subsequent recoil, which is proportional to the elastic stress (7, 39, 43), was  
498 recorded at a frame rate of 1/0.48 s. Images were registered using the StackReg  
499 plugin in FIJI (78, 79) to correct for small movements of the rosette colony due to  
500 flagellar motion during acquisition of images. Recoil velocities were measured in the  
501 frames following ablation by particle image velocimetry (PIV) using PIVlab software  
502 in MATLAB (81). Settings for PIV included four direct Fourier transform correlation  
503 passes with window sizes of 64, 32, 16 and 8 pixels and corresponding step sizes of  
504 32, 16, 8, and 4 pixels. To reject noise and erroneous velocities, filters of 7 standard  
505 deviations about the mean and local median filters with a threshold of 5 and epsilon



506 of 0.1 were applied. Finally, any remaining velocity measurements not  
507 corresponding to displacements of cells in rosettes were manually rejected. Recoil  
508 velocities were measured in the subsequent 3 frames following ablation by radial  
509 scans about the circumference of the rosette, and the maximum measured velocity  
510 was selected.

511

### 512 ***Strontium treatment***

513 For strontium treatment of rosettes, SrEpac cultures were centrifuged at  
514 1500g for 10 to pellet all cells and resuspended in 5% SWC media containing added  
515 SrCl<sub>2</sub> to a final concentration of either 0, 2.5, or 5 mM. These cells were then induced  
516 to form rosettes as described above. Morphological analysis and laser ablation were  
517 also conducted as described above.

518 For cell growth assays (Fig. S4), SrEpac cultures were prepared as described  
519 in the preceding paragraph but were not induced to form rosettes. Cells were then  
520 plated into 12-well plates (Falcon) at an initial density of 20000 cells/mL. To  
521 determine cell density, cells were counted using a hemocytometer (Hausser  
522 Scientific) viewed in phase contrast on a Leica DMIL microscope with a 20x (Leica, N  
523 Plan, 0.35 NA) objective. Cells were counted at 4, 24, and 28 hours. Growth rates  
524 were then determined by exponential fits to the log-phase of growth obtained using  
525 the Curve Fitting application in MATLAB.

526

### 527 ***Simulations***

528 Cells and ECM were modelled as spherical particles (Fig. 6) with interactions  
 529 that allowed us to tune the various morphological and material properties we  
 530 wished to investigate. The particle representation allowed us to capture both the  
 531 relevant geometric aspects of colony formation including polarized cell divisions  
 532 and ECM secretion as well as the discrete and stochastic nature of these processes.

### 533 Cells

534 Each cell was composed of three linked particles with diameters  $d_1$ ,  $d_2$ , and  
 535  $d_3$  representing the basal pole, cell body, and collar and in ascending order of  
 536 magnitude, to capture cell geometry. Cell particles interacted sterically with one  
 537 another via the hard-sphere Weeks-Chandler-Andersen (WCA) potential (82):

$$538 \quad V_{WCA}(R) = 4\varepsilon_{WCA} \left[ \left( \frac{d_i}{R} \right)^{12} - \left( \frac{d_i}{R} \right)^6 \right] + \Delta V(R) \text{ for } R < R_{cut}, \text{ and}$$

$$539 \quad V_{WCA}(R) = 0 \text{ for } R > R_{cut}$$

540 where  $R$  is the interparticle distance;  $d_i$  with  $i = 1, 2, 3$  is the cell particle diameter;  
 541  $\varepsilon_{WCA}$  sets the force of repulsion upon overlap;  $\Delta V(R) = V_{LJ}(R_{cut})$  where  $V_{LJ}$  is the  
 542 Lennard-Jones potential (82):

$$543 \quad V_{LJ}(R) = 4\varepsilon \left[ \left( \frac{d_i}{R} \right)^{12} - \left( \frac{d_i}{R} \right)^6 \right]$$

544 with  $\varepsilon = \varepsilon_{WCA}$ ; and  $R_{cut} = 2^{\frac{1}{6}}d_i$  is the cutoff distance for the potential set to the  
 545 diameter of the cell particle. For a given cell, cohesion of particles was maintained  
 546 using a finitely extensible nonlinear elastic (FENE) potential:

$$547 \quad V_{FENE}(R) = \frac{1}{2}k_{FENE}R_0^2 \left( 1 - \left( \frac{R - \Delta}{R_0} \right)^2 \right) + V_{WCAS}(R)$$

548 where  $k_{FENE}$  sets the strength of the potential;  $R_0 = d_1$  (set to maintain cohesion);  $R$   
549 is the interparticle distance;  $\Delta = \frac{d_i + d_j}{2} - d_1$  where  $d_k$  is the diameter of the  $k^{th}$   
550 particle; and

$$551 \quad V_{WCAS}(R) = 4\varepsilon_{WCA} \left[ \left( \frac{d_i}{R-\Delta} \right)^{12} - \left( \frac{d_i}{R-\Delta} \right)^6 \right] \text{ for } R - \Delta < 2^{\frac{1}{6}}\Delta, \text{ and}$$

$$552 \quad V_{WCAS}(R) = 0 \text{ for } R - \Delta \geq 2^{\frac{1}{6}}\Delta.$$

553 Additionally, a harmonic potential acting between the basal and apical cell particle  
554 was used to keep cells straight and elongated:

$$555 \quad V_h(R) = \frac{1}{2}k(R - R_E)^2$$

556 where the spring constant  $k = k_h$  sets the strength of the potential, and rest length  
557  $R_E = 2(d_1/2 + d_2 + d_3/2)$  was chosen to be large enough to ensure cell elongation.  
558 For simplicity, the mass of all cell particles was the same, and the friction coefficient  
559 was otherwise determined by viscosity,  $\eta$  and the particle diameter,  $d$ :  $\gamma = 6\pi\eta d$ .

## 560 **ECM**

561 ECM was composed of small particles with diameter  $d_{ECM} \ll d_1$ . To maintain  
562 ECM cohesion (while preventing divergence in energy) and volume, allow for ECM  
563 deformations and shape transformation, and for computational tractability, ECM-  
564 ECM particle interactions were also modeled by a modified Lennard-Jones potential  
565 (83), which reduces interparticle repulsion and better describes a condensed state,  
566 such as ECM:

$$567 \quad V_{MLJ}(R) = 4\varepsilon \left[ \left( \frac{d_{ECM}}{R} \right)^4 - \left( \frac{d_{ECM}}{R} \right)^2 \right] \text{ for } R < R_{cut}, \text{ and}$$

$$568 \quad V_{MLJ}(R) = 0 \text{ for } R > R_{cut}$$

569 where  $R$  is the interparticle distance,  $\varepsilon = \varepsilon_{ECM}$  sets the strength of ECM adhesion,  
 570 and  $R_{cut} = 2^{\frac{1}{6}}d_{ECM}$  is the cutoff distance for the potential.

### 571 **Cell-ECM interactions**

572 To capture adhesive interactions while preventing particle overlap and for  
 573 computational tractability, cell-ECM adhesion was modeled with a modified  
 574 Lennard-Jones potential between basal cell particles and ECM particles:

$$575 \quad V_{SLJ}(R) = 4\varepsilon_{ECM} \left[ \left( \frac{d_{ECM}}{R-\Delta} \right)^{12} - \left( \frac{d_{ECM}}{R-\Delta} \right)^6 \right] \text{ for } R < R_{cut} + \Delta, \text{ and}$$

$$576 \quad V_{SLJ}(R) = 0 \text{ for } R \geq R_{cut} + \Delta$$

577 where  $R_{cut} = 2^{\frac{1}{6}}d_{ECM}$ , and  $\Delta = \frac{d_{ECM} + d_1}{2} - d_1$ .

### 578 **Cell division**

579 Cells were allowed to divide stochastically, with probability  $p_{Div}(t) =$   
 580  $\frac{1}{1 - e^{-\mu(t - \tau_{Div})}}$  where  $\tau_{Div}$  is the cell cycle time, and  $\mu = \frac{\tau_{Div}}{10}$  sets the variability in  
 581 division timing. The division plane orientation around the apico-basal axis was set  
 582 by the previous division. During division, cell particles are replicated and shifted  
 583 slightly (starting with a separation  $0.25d_i$  for particle  $i$ ) in the direction  
 584 perpendicular to the division plane by an offset  $D_{Div}$ . Dividing cell particles then  
 585 push one another apart under the influence of a harmonic potential with increasing  
 586 rest length:  $V_h(R) = \frac{1}{2}k(R - R_p)^2$  where the spring constant  $k = k_{Div}$  sets the  
 587 strength of the potential, and hence, how much force the cells can exert during  
 588 growth and division; and rest length  $R_p$  increases with each timestep in the  
 589 simulation by an amount  $\delta R = \frac{(d_i + 2^{\frac{1}{6}} - 1)}{g_{Div}}$  where  $g_{Div}$  is the number of timesteps over

590 which division occurs for particle  $i$ . Cell division is complete once  $R_p \geq d_i$  for all  
591 particles. With this implementation of cell division, we approximated both cell  
592 growth (while particles are still overlapping) and division.

### 593 **ECM secretion**

594 ECM particles were secreted stochastically from non-dividing cells at a  
595 constant rate with a probability  $1 - p_{Div}(t)$  from the basal pole of non-dividing cells.  
596 Secretion always occurred in the direction of the apico-basal axis of cells. Similarly  
597 to division, ECM particles were extended from the basal pole according to a  
598 harmonic potential with  $k = k_{ECM}$  setting the force with which ECM particles were  
599 secreted; the rest length  $R_p$  increased with every time step by  $\delta R = \frac{(d_{ECM} + 2^{\frac{1}{6}} - 1)}{g_{SEC}}$   
600 where  $g_{SEC}$  is the number of timesteps over which secretion occurs. Secretion is  
601 complete once  $R_p = \frac{d_1 + d_{ECM}}{2}$ .

### 602 **Running simulations**

603 Simulations were carried out using Fortran and followed Brownian dynamics  
604 (84):

$$605 \quad \dot{X} = \frac{\sqrt{\gamma k_B T D(t) - \nabla U(X)}}{\gamma},$$

606 where  $X$  and  $\dot{X}$  are position and velocity;  $U(X)$  is the sum of all interaction  
607 potentials acting on a given element of the system (particle), so  $-\nabla U(X)$  with  $\nabla$  as  
608 the gradient operator, is the force resulting from the total interaction potential on a  
609 given element of the system (particle);  $\gamma$  is the friction coefficient,  $k_B$  is Boltzmann's  
610 constant,  $T$  is temperature, and  $D(t)$  is a delta correlated, stationary Gaussian  
611 process with 0 mean. For simplicity, the mass of all particles was the same, and the

612 friction coefficient was otherwise determined by viscosity,  $\eta$  and the particle  
613 diameter,  $d$ :  $\gamma = 6\pi\eta d$ . A Verlet integration algorithm was used to update the  
614 positions of the spheres at each timestep in the simulation (85).

615 Code for running simulations is available on GitHub:

616 [https://github.com/truizherrero/choanoflagellate\\_colonies](https://github.com/truizherrero/choanoflagellate_colonies).

## 617 **Simulation analysis**

618 In the model, three main parameters corresponding to physical aspects of  
619 choanoflagellate cells and rosettes describe the system: 1) cell aspect ratio, defined  
620 to be the length to width ratio of the three particle system:  $\frac{d_1+d_2+d_3}{d_3}$ ; 2) scaled ECM  
621 stiffness relative to the force exerted during cell growth and division:  $\frac{\varepsilon_{ECM}}{k_{Div}d_1^2}$ ; and 3)

622 The ECM volume relative to cell volume secreted by a cell between divisions:

623  $\frac{nd_{ECM}^3}{2(d_1^3+d_2^3+d_3^3)}$  where  $n = \frac{\tau_{Div}}{\tau_{Sec}}$  with  $\tau_{Sec} = \frac{R_p}{\delta R}$  is the average number of ECM particles

624 secreted between divisions.

625 Natural units for the system are the length  $d_1$ , time  $\tau_{Div}$ , and energy  $k_B T$ . For  
626 all simulations, the following values in system units were held fixed:  $k_{FENE} =$

627  $500 \frac{k_B T}{d_1^2}$ ,  $\eta = 50 \frac{k_B T \tau_{Div}}{d_1^3}$ ,  $k_h = 200 \frac{k_B T}{d_1^2}$ ,  $g_{Div} = 5000 \frac{d_1^3}{\tau_{Div}}$ , and  $g_{Sec} = 5000 \frac{d_1^3}{\tau_{Div}}$ . All

628 other parameters not already fixed in the previous paragraphs were varied to  
629 explore the morphospace (Fig. 6B), with axes corresponding to the three main  
630 parameters detailed in the previous section. The timestep for simulations was  
631  $0.001\tau_{Div}$ . Simulation snapshots for Fig. 6 were rendered for the visual inspection of  
632 morphologies using Python. Rosettes were defined as structures with cells  
633 completely surrounding a central region of ECM; disks were defined as structures

634 that maintained a closed ring of cells pointing radially outward along the colony  
635 circumference with an open central region of ECM; cups and cones were defined as  
636 structures with cells clustered together, oriented in roughly the same direction,  
637 opposed to an open ECM emanating away from the basal pole of all cells; and trees  
638 were defined as structures with cells oriented in a similar fashion to those in cones  
639 but with the ECM displaying a dichotomous branching structure. Quantitative  
640 analyses of simulation results (Fig. S5) were carried out in MATLAB.

641 **Acknowledgements:**

642 We thank Kent McDonald and Reena Zalpuri of the Electron Microscopy Laboratory  
643 at UC Berkeley for assistance with TEM sample preparation and imaging. We would  
644 also like to thank Mary West of the CIRM/QB3 Shared Stem Cell Facility at UC  
645 Berkeley. Additionally, we thank George Oster and Danny Wells for helpful  
646 discussions concerning conceptual development of this project. Finally, we thank  
647 the members of the King Lab for critical feedback and stimulating discussions. This  
648 work was performed in part in the SSCF, which provided the Olympus BX51WI  
649 microscope with Swept Field Confocal technology. This material is based upon work  
650 supported by the National Science Foundation Graduate Research Fellowship under  
651 Grant No. DGE 1106400 (to B.T.L.), the Simons Foundation (T.R.H.) the Howard  
652 Hughes Medical Institute (N.K.), and the National Institutes of Health (NIH) under  
653 award numbers F31GM119329 (to S.L.), R01GM122375 (to S.K.), and R21EB016359  
654 (to S.K.).



- 655 1. Harvey W (1651) *Exercitationes de generatione animalium. Quibus accedunt*  
656 *quaedam de partu: de membranis ac humoribus uteri: & de conceptione* (Typis  
657 Du-Gardianis, London) doi:<https://doi.org/10.5962/bhl.title.44364>.
- 658 2. Gilbert SF (2000) *Developmental biology* (Sinauer Associates, Sunderland).
- 659 3. Golling G, et al. (2002) Insertional mutagenesis in zebrafish rapidly identifies  
660 genes essential for early vertebrate development. *Nat Genet* 31(2):135–140.
- 661 4. Xue Z, et al. (2013) Genetic programs in human and mouse early embryos  
662 revealed by single-cell RNA sequencing. *Nature* 500(7464):593–597.
- 663 5. Chen B-C, et al. (2014) Lattice light-sheet microscopy: imaging molecules to  
664 embryos at high spatiotemporal resolution. *Science* 346(6208):1257998.
- 665 6. Keller PJ, Schmidt AD, Wittbrodt J, Stelzer EHK (2008) Reconstruction of  
666 zebrafish early embryonic development by scanned light sheet microscopy.  
667 *Science* 322(5904):1065–9.
- 668 7. Behrndt M, et al. (2012) Forces Driving Epithelial Spreading in Zebrafish  
669 Gastrulation. *Science (80- )* 338(6104):257–260.
- 670 8. Mayer M, Depken M, Bois JS, Jülicher F, Grill SW (2010) Anisotropies in  
671 cortical tension reveal the physical basis of polarizing cortical flows. *Nature*  
672 467(7315):617–621.
- 673 9. Bailles A, et al. (2018) Transcriptional initiation and mechanically driven self-  
674 propagation of a tissue contractile wave during axis elongation.  
675 *bioRxiv*:430512.
- 676 10. Carr M, Leadbeater BSC, Hassan R, Nelson M, Baldauf SL (2008) Molecular  
677 phylogeny of choanoflagellates, the sister group to Metazoa. *Proc Natl Acad Sci*

- 678 105(43). doi:10.1073/pnas.0801667105.
- 679 11. King N, et al. (2008) The genome of the choanoflagellate *Monosiga brevicollis*  
680 and the origin of metazoans. *Nature* 451(7180):783–788.
- 681 12. Ruiz-Trillo I, Roger AJ, Burger G, Gray MW, Lang BF (2008) A Phylogenomic  
682 Investigation into the Origin of Metazoa. *Mol Biol Evol* 25(4):664–672.
- 683 13. Leadbeater BSC (2015) *The Choanoflagellates* (Cambridge University Press,  
684 Cambridge) doi:10.1017/CBO9781139051125.
- 685 14. Brunet T, King N (2017) The Origin of Animal Multicellularity and Cell  
686 Differentiation. *Dev Cell* 43(2):124–140.
- 687 15. Leadbeater BSC (1983) Life-history and ultrastructure of a new marine  
688 species of Proterospongia (Choanoflagellida). *J Mar Biol Assoc United Kingdom*  
689 63(01):135.
- 690 16. Dayel MJ, et al. (2011) Cell differentiation and morphogenesis in the colony-  
691 forming choanoflagellate *Salpingoeca rosetta*. *Dev Biol* 357(1):73–82.
- 692 17. Fairclough SR, Dayel MJ, King N (2010) Multicellular development in a  
693 choanoflagellate. *Curr Biol* 20(20):R875–R876.
- 694 18. Levin TC, Greaney AJ, Wetzel L, King N (2014) The rosetteless gene controls  
695 development in the choanoflagellate *S. rosetta*. *Elife* 3.  
696 doi:10.7554/eLife.04070.
- 697 19. Wetzel LA, et al. (2018) Predicted glycosyltransferases promote development  
698 and prevent spurious cell clumping in the choanoflagellate *S. rosetta*. *Elife* 7.  
699 doi:10.7554/eLife.41482.
- 700 20. Sulston JE, Schierenberg E, White JG, Thomson JN (1983) The embryonic cell

- 701 lineage of the nematode *Caenorhabditis elegans*. *Dev Biol* 100(1):64–119.
- 702 21. Leys SP, Ereskovsky A V (2006) Embryogenesis and larval differentiation in  
703 sponges. *Can J Zool* 84(2):262–287.
- 704 22. Lewis WH, Wright ES (1935) *On the early development of the mouse egg*  
705 (Carnegie Institution of Washington, Washington).
- 706 23. Alegado RA, et al. (2012) A bacterial sulfonolipid triggers multicellular  
707 development in the closest living relatives of animals. *Elife* 1:e00013.
- 708 24. Woznica A, et al. (2016) Bacterial lipids activate, synergize, and inhibit a  
709 developmental switch in choanoflagellates. *Proc Natl Acad Sci U S A*  
710 113(28):7894–9.
- 711 25. Hannezo E, Prost J, Joanny J-F Theory of epithelial sheet morphology in three  
712 dimensions. *Proc Natl Acad Sci U S A*. doi:10.1073/pnas.1312076111.
- 713 26. Yan J, Sharo AG, Stone HA, Wingreen NS, Bassler BL (2016) *Vibrio cholerae*  
714 biofilm growth program and architecture revealed by single-cell live imaging.  
715 *Proc Natl Acad Sci U S A* 113(36):E5337-43.
- 716 27. Savin T, et al. (2011) On the growth and form of the gut. *Nature*  
717 476(7358):57–62.
- 718 28. Forgács G, Newman SA (2005) *Biological physics of the developing embryo*  
719 (Cambridge University Press, Cambridge).
- 720 29. Ingber DE (2006) Mechanical control of tissue morphogenesis during  
721 embryological development. *Int J Dev Biol* 50(2–3):255–266.
- 722 30. Deppe U, et al. (1978) Cell lineages of the embryo of the nematode  
723 *Caenorhabditis elegans*. *Proc Natl Acad Sci* 75(1):376–380.

- 724 31. Newport J, Kirschner M (1982) A major developmental transition in early  
725 *Xenopus* embryos: I. characterization and timing of cellular changes at the  
726 midblastula stage. *Cell* 30(3):675–86.
- 727 32. Kane DA, Kimmel CB (1993) The zebrafish midblastula transition.  
728 *Development* 119(2):447–56.
- 729 33. Edgar BA, O’Farrell PH (1989) Genetic control of cell division patterns in the  
730 *Drosophila* embryo. *Cell* 57(1):177–87.
- 731 34. Bišová K, Zachleder V (2014) Cell-cycle regulation in green algae dividing by  
732 multiple fission. *J Exp Bot* 65(10):2585–2602.
- 733 35. Umen JG, Olson BJSC (2012) Genomics of Volvocine Algae. *Adv Bot Res*  
734 64:185–243.
- 735 36. Matt G, Umen J (2016) Volvox: A simple algal model for embryogenesis,  
736 morphogenesis and cellular differentiation. *Dev Biol* 419(1):99–113.
- 737 37. Laundon D, Larson B, McDonald K, King N, Burkhardt P (2018) The  
738 architecture of cell differentiation in choanoflagellates and sponge  
739 choanocytes. *bioRxiv*:452185.
- 740 38. Roque-Barreira MC, Praz F, Halbwachs-Mecarelli L, Greene LJ, Campos-Neto A  
741 (1986) IgA-affinity purification and characterization of the lectin jacalin. *Rev*  
742 *Bras Pesqui Med Biol* 19(2):149–57.
- 743 39. Ma X, Lynch HE, Scully PC, Hutson MS (2009) Probing embryonic tissue  
744 mechanics with laser hole drilling. *Phys Biol* 6(3):036004.
- 745 40. Hutson MS, et al. (2009) Combining Laser Microsurgery and Finite Element  
746 Modeling to Assess Cell-Level Epithelial Mechanics. *Biophys J* 97(12):3075–

- 747 3085.
- 748 41. Rauzi M, Lenne P-F (2011) Cortical Forces in Cell Shape Changes and Tissue  
749 Morphogenesis. *Curr Top Dev Biol* 95:93–144.
- 750 42. Bonnet I, et al. (2012) Mechanical state, material properties and continuous  
751 description of an epithelial tissue. *J R Soc Interface* 9(75):2614–23.
- 752 43. Hutson MS, et al. (2003) Forces for morphogenesis investigated with laser  
753 microsurgery and quantitative modeling. *Science* 300(5616):145–9.
- 754 44. Kuo CK, Ma PX (2001) Ionically crosslinked alginate hydrogels as scaffolds for  
755 tissue engineering: Part 1. Structure, gelation rate and mechanical properties.  
756 *Biomaterials* 22(6):511–521.
- 757 45. Chaudhuri O, et al. (2014) Extracellular matrix stiffness and composition  
758 jointly regulate the induction of malignant phenotypes in mammary  
759 epithelium. *Nat Mater* 13(10):970–978.
- 760 46. Ryan EA, Mockros LF, Weisel JW, Lorand L (1999) Structural Origins of Fibrin  
761 Clot Rheology. *Biophys J* 77(5):2813–2826.
- 762 47. Wilkie IC, et al. (2006) Mechanical adaptability of a sponge extracellular  
763 matrix: evidence for cellular control of mesohyl stiffness in *Chondrosia*  
764 *reniformis* Nardo. *J Exp Biol* 209(22):4436–4443.
- 765 48. Mo J, et al. (2016) Interfibrillar stiffening of echinoderm mutable collagenous  
766 tissue demonstrated at the nanoscale. *Proc Natl Acad Sci U S A*  
767 113(42):E6362–E6371.
- 768 49. Purcell EM (1977) Life at low Reynolds number. *Am J Phys* 45(1):3–11.
- 769 50. Higdon JJJ (1979) The generation of feeding currents by flagellar motions. *J*

- 770            *Fluid Mech* 94(02):305.
- 771    51.    Raup DM (1967) Geometric Analysis of Shell Coiling: Coiling in Ammonoids.  
772            *JPaleo* 41(1):43–65.
- 773    52.    Calkins GN (1914) *Biology* (Henry Holt and Company, New York)  
774            doi:<https://doi.org/10.5962/bhl.title.24281>.
- 775    53.    Saville-Kent W (1881) *A manual of the Infusoria : including a description of all*  
776            *known flagellate, ciliate, and tentaculiferous protozoa, British and foreign, and*  
777            *an account of the organization and the affinities of the sponges* (David Bogue,  
778            London) doi:<https://doi.org/10.5962/bhl.title.1243>.
- 779    54.    Hufnagel L, Teleman AA, Rouault H, Cohen SM, Shraiman BI (2007) On the  
780            mechanism of wing size determination in fly development. *Proc Natl Acad Sci*  
781            104(10):3835–3840.
- 782    55.    Shyer AE, et al. (2013) Villification: How the gut gets its villi. *Science* (80- )  
783            342(6155):212–218.
- 784    56.    Jacobeen S, et al. (2018) Cellular packing, mechanical stress and the evolution  
785            of multicellularity. *Nat Phys* 14(3):286–290.
- 786    57.    Petridou NI, Spiró Z, Heisenberg C-P (2017) Multiscale force sensing in  
787            development. *Nat Cell Biol* 19(6):581–588.
- 788    58.    Shraiman BI (2005) Mechanical feedback as a possible regulator of tissue  
789            growth. *Proc Natl Acad Sci U S A* 102(9):3318–23.
- 790    59.    Guillot C, Lecuit T (2013) Mechanics of epithelial tissue homeostasis and  
791            morphogenesis. *Science* 340(6137):1185–9.
- 792    60.    Moreno E, Valon L, Levillayer F, Levayer R (2018) Competition for Space

- 793 Induces Cell Elimination through Compaction-Driven ERK Downregulation.  
794 *Curr Biol* 29(1):23-34.e8.
- 795 61. Pastor-Pareja JC, Xu T (2011) Shaping cells and organs in *Drosophila* by  
796 opposing roles of fat body-secreted Collagen IV and perlecan. *Dev Cell*  
797 21(2):245–56.
- 798 62. Crest J, Diz-Muñoz A, Chen D-Y, Fletcher DA, Bilder D (2017) Organ sculpting  
799 by patterned extracellular matrix stiffness. *Elife* 6. doi:10.7554/eLife.24958.
- 800 63. Moore KA, et al. (2005) Control of basement membrane remodeling and  
801 epithelial branching morphogenesis in embryonic lung by Rho and  
802 cytoskeletal tension. *Dev Dyn* 232(2):268–281.
- 803 64. Harunaga JS, Doyle AD, Yamada KM (2014) Local and global dynamics of the  
804 basement membrane during branching morphogenesis require protease  
805 activity and actomyosin contractility. *Dev Biol* 394(2):197–205.
- 806 65. Adams DS, Keller R, Koehl MA (1990) The mechanics of notochord elongation,  
807 straightening and stiffening in the embryo of *Xenopus laevis*. *Development*  
808 110(1).
- 809 66. Li Q, et al. (2016) Extracellular matrix scaffolding guides lumen elongation by  
810 inducing anisotropic intercellular mechanical tension. *Nat Cell Biol*  
811 18(3):311–318.
- 812 67. Hallmann A, Kirk DL (2000) The developmentally regulated ECM glycoprotein  
813 ISG plays an essential role in organizing the ECM and orienting the cells of  
814 *Volvox*. *J Cell Sci* 113(24).
- 815 68. Ueki N, Nishii I Controlled Enlargement of the Glycoprotein Vesicle

- 816 Surrounding a Volvox Embryo Requires the InvB Nucleotide-Sugar  
817 Transporter and Is Required for Normal Morphogenesis W. *Plant Cell*.  
818 doi:10.1105/tpc.109.066159.
- 819 69. Drescher K, et al. (2016) Architectural transitions in *Vibrio cholerae* biofilms  
820 at single-cell resolution. *Proc Natl Acad Sci U S A* 113(14):E2066-72.
- 821 70. Moore RL, Marshall KC (1981) Attachment and rosette formation by  
822 hyphomicrobia. *Appl Environ Microbiol* 42(5):751-7.
- 823 71. Frank O, et al. (2015) Plasmid curing and the loss of grip – The 65-kb replicon  
824 of *Phaeobacter inhibens* DSM 17395 is required for biofilm formation,  
825 motility and the colonization of marine algae. *Syst Appl Microbiol* 38(2):120-  
826 127.
- 827 72. Nedashkovskaya OI, et al. (2006) *Echinicola pacifica* gen. nov., sp. nov., a novel  
828 flexibacterium isolated from the sea urchin *Strongylocentrotus intermedius*.  
829 *Int J Syst Evol Microbiol* 56(5):953-958.
- 830 73. Levin TC, King N (2013) Evidence for Sex and Recombination in the  
831 Choanoflagellate *Salpingoeca rosetta*. *Curr Biol* 23(21):2176-2180.
- 832 74. Alegado RA, et al. (2013) *Algoriphagus machipongonensis* sp. nov., co-isolated  
833 with a colonial choanoflagellate. *Int J Syst Evol Microbiol* 63(Pt 1):163-8.
- 834 75. Fairclough SR, et al. (2013) Premetazoan genome evolution and the regulation  
835 of cell differentiation in the choanoflagellate *Salpingoeca rosetta*. *Genome Biol*  
836 14(2):R15.
- 837 76. McDonald KL, Webb RI (2011) Freeze substitution in 3 hours or less. *J Microsc*  
838 243(3):227-233.



- 839 77. McDonald KL (2014) Rapid Embedding Methods into Epoxy and LR White  
840 Resins for Morphological and Immunological Analysis of Cryofixed Biological  
841 Specimens. *Microsc Microanal* 20(01):152–163.
- 842 78. Schindelin J, et al. (2012) Fiji: an open-source platform for biological-image  
843 analysis. *Nat Methods* 9(7):676–682.
- 844 79. Schneider CA, Rasband WS, Eliceiri KW (2012) NIH Image to ImageJ: 25 years  
845 of image analysis. *Nat Methods* 9(7):671–675.
- 846 80. Voronoi G (1908) Nouvelles applications des paramètres continus à la théorie  
847 des formes quadratiques. Premier mémoire. Sur quelques propriétés des  
848 formes quadratiques positives parfaites. *J für die reine und Angew Math*  
849 133:97–178.
- 850 81. Ryerson WG, Schwenk K (2012) A simple, inexpensive system for digital  
851 particle image velocimetry (DPIV) in biomechanics. *J Exp Zool Part A Ecol*  
852 *Genet Physiol* 317(2):127–140.
- 853 82. Weeks JD, Chandler D, Andersen HC (1971) Role of Repulsive Forces in  
854 Determining the Equilibrium Structure of Simple Liquids. *J Chem Phys*  
855 54(12):5237–5247.
- 856 83. Jones JE (1924) On the Determination of Molecular Fields. I. From the  
857 Variation of the Viscosity of a Gas with Temperature. *Proc R Soc A Math Phys*  
858 *Eng Sci* 106(738):441–462.
- 859 84. Doyle PS, Underhill PT (2005) Brownian Dynamics Simulations of Polymers  
860 and Soft Matter. *Handbook of Materials Modeling* (Springer Netherlands,  
861 Dordrecht), pp 2619–2630.

- 862 85. Verlet L (1967) Computer &quot;Experiments&quot; on Classical Fluids. I.  
863 Thermodynamical Properties of Lennard-Jones Molecules. *Phys Rev*  
864 159(1):98–103.
- 865 86. Haeckel E (1904) *Kunstformen der Natur* (Verlag des Bibliographischen  
866 Instituts, Leipzig, Wien).
- 867 87. Richter DJ, Fozouni P, Eisen MB, King N (2018) Gene family innovation,  
868 conservation and loss on the animal stem lineage. *Elife* 7.  
869 doi:10.7554/eLife.34226.
- 870 88. Ertl M (1981) Zur taxonomie der Gattung Proterospongia Kent. *Arch für*  
871 *Protistenkd* 124(3):259–266.
- 872 89. Wadell H Volume, Shape, and Roundness of Quartz Particles. *Source J Geol*  
873 43(3):250–280.  
874

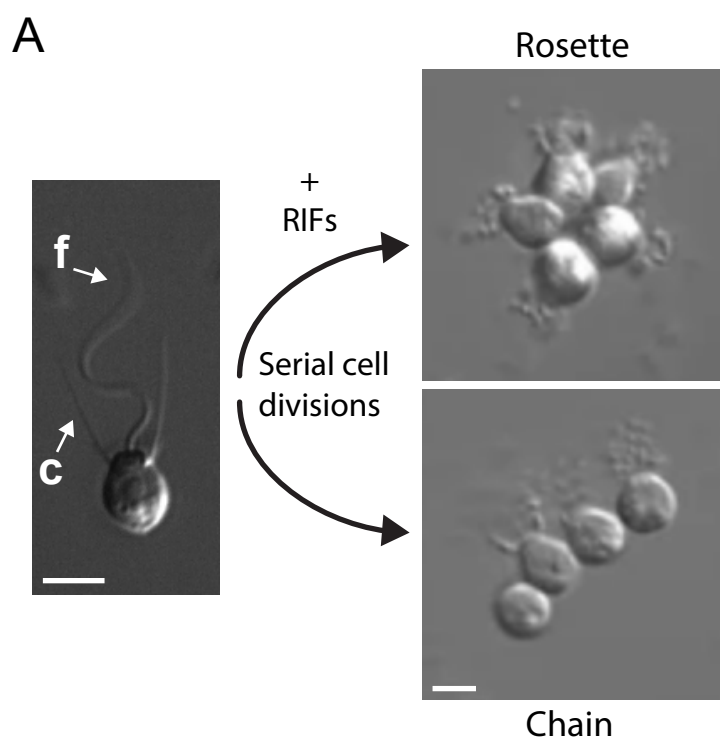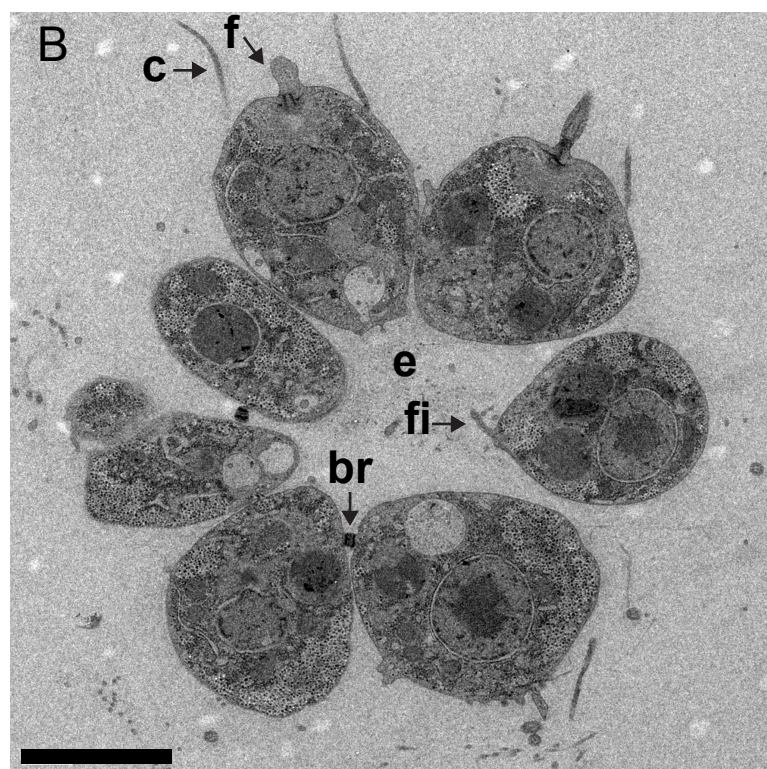

875 **Figure 1. The choanoflagellate *Salpingoeca rosetta* develops from a single cell**  
876 **into multicellular colonies through serial rounds of cell divisions (17). (A)** All  
877 choanoflagellate cells bear a diagnostic “collar complex” composed of an apical  
878 flagellum (f) surrounded by an actin-filled collar of microvilli (c) (13, 14). *S. rosetta*  
879 produces two different colonial forms depending on environmental conditions:  
880 compact, mechanically robust, roughly spherical rosette colonies (Rosette) that  
881 form in the presence of specific bacterially produced Rosette Inducing Factors (RIFs;  
882 (16, 17, 23, 24)), and fragile, linear chain colonies (Chain) that form during rapid cell  
883 growth in the absence of RIFs (16). Both types of colonies form developmentally by  
884 serial cell divisions. Single cell image adapted from (16), and rosette and chain  
885 images adapted from (19). **(B)** A thin section through the equator of a rosette,  
886 imaged by transmission electron microscopy, reveals the subcellular architecture of  
887 a rosette. Cells in rosettes are packed close to one another around a central focus  
888 with the collar complex of each cell facing outward into the environment (c=collar  
889 and f=flagellum). Most cells are connected to one another by thin cytoplasmic  
890 bridges (br, only two of which are visible in this section) (37), which are also  
891 present in chains (16). The center of rosettes is devoid of cells but is filled with a  
892 secreted extracellular matrix (e, faintly visible here as granular material), into which  
893 cells extend filopodia (fi) (16, 18). All scale bars = 3  $\mu$ m.

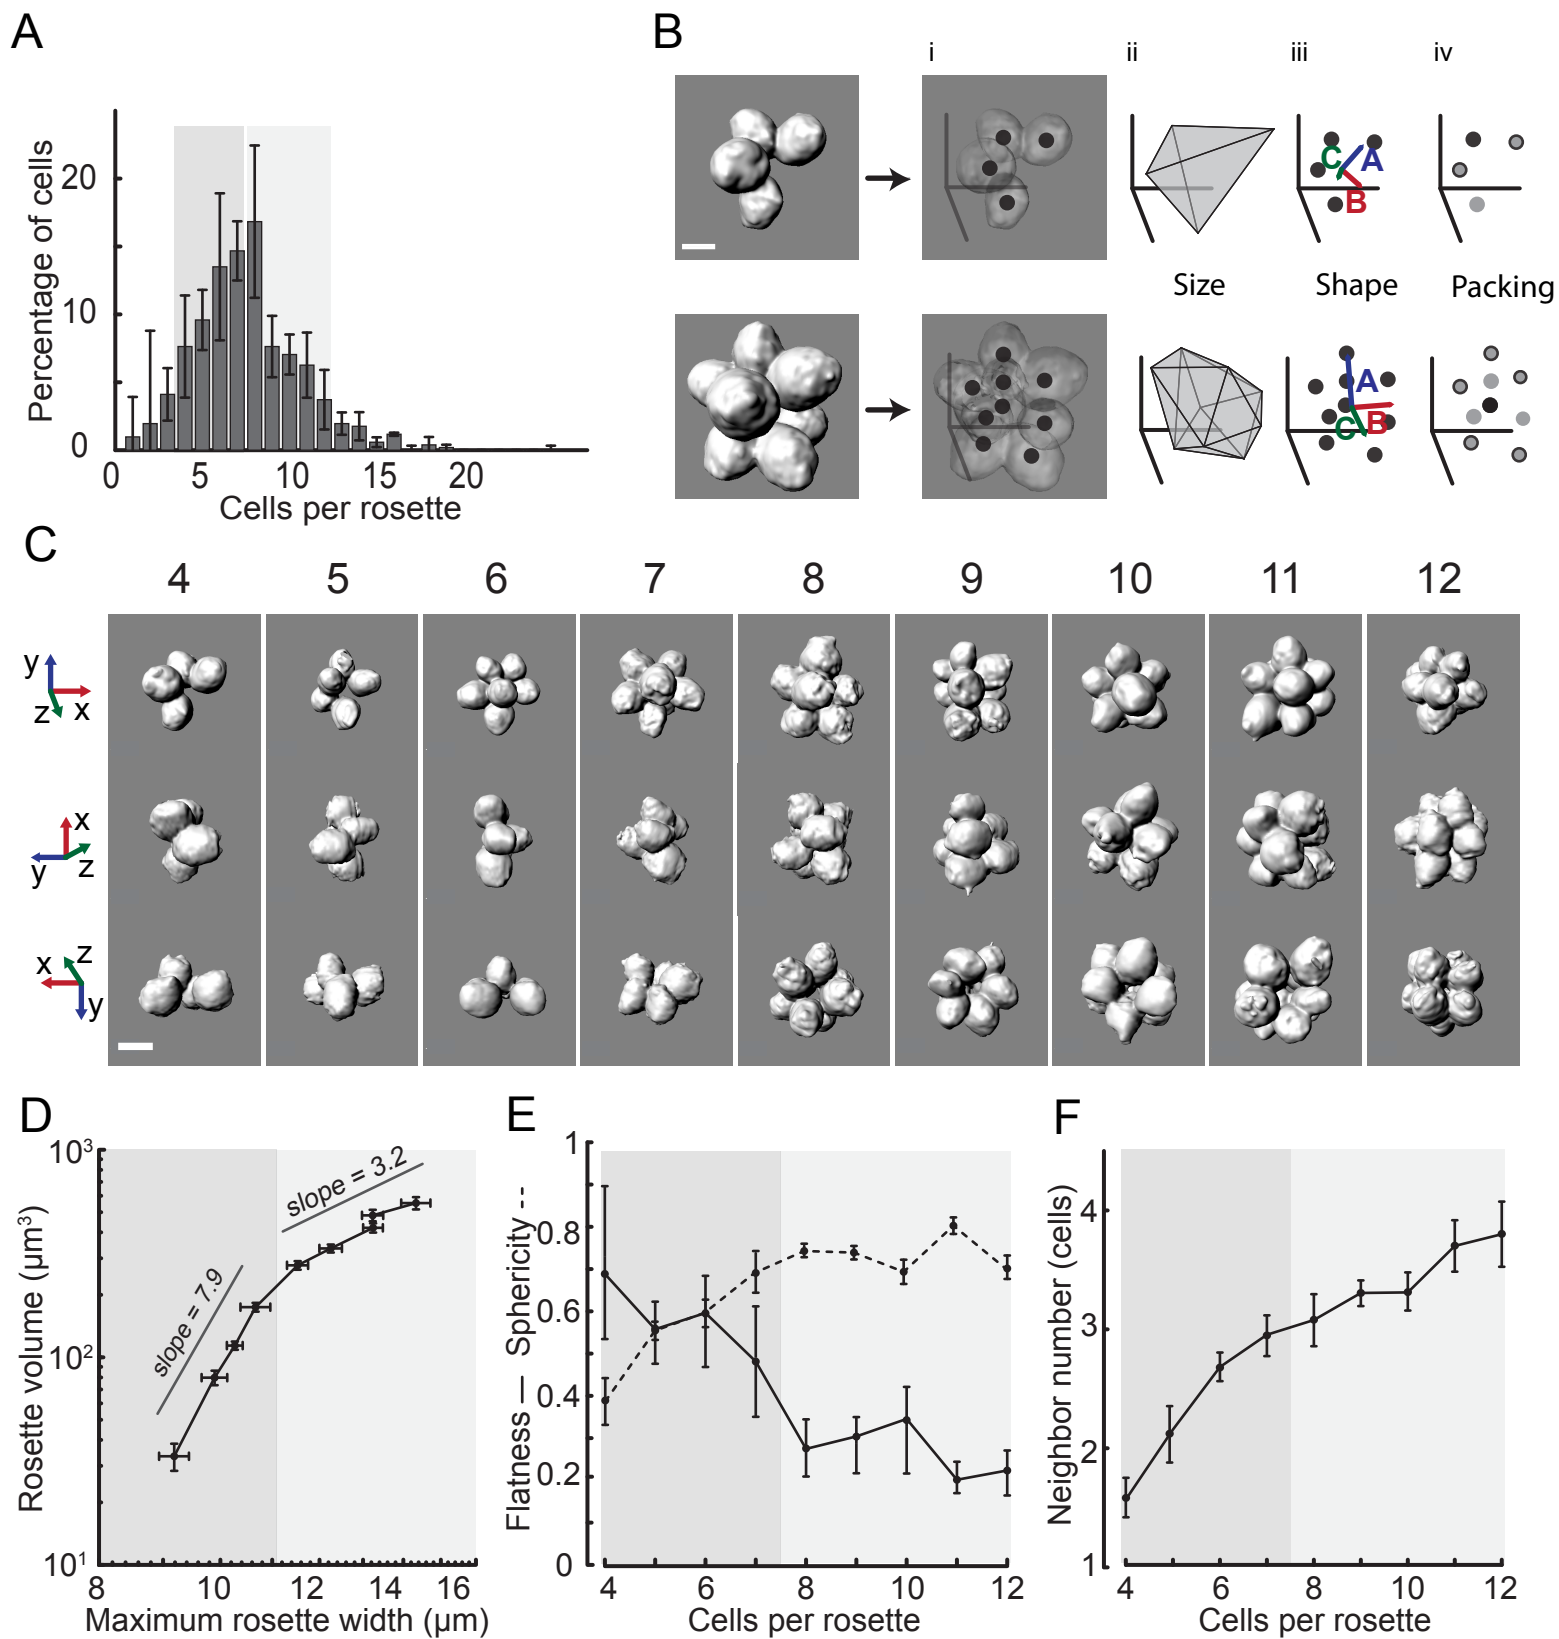

894 **Figure 2. Quantitative analysis of rosette morphology reveals that rosettes**  
895 **undergo a reproducible 2D-3D growth transition.** (A) In cultures grown under  
896 conditions of constant rosette induction, *S. rosetta* existed as unicells, doublets,  
897 triplets, and rosettes containing between 4 - 25 cells (an “individual” refers to any  
898 unicell or group of cells in each of these categories), with the most common rosette  
899 size being 8 cells/individual. Shown is the mean percentage of total cells in a  
900 population (y-axis) found in single cells, cell doublets, cell triplets, and rosettes of  
901 increasing size, plotted by number of cells/rosette (x-axis). Error bars indicate  
902 standard deviations from measurements obtained on three different days. N = 511.  
903 (B) Our image analysis pipeline allowed us to quantify and compare rosette  
904 morphology and is illustrated here for two representative rosettes. From left to  
905 right, for each rosette, (i) cell positions were extracted from segmented images and  
906 then used to determine aspects of rosette morphology including (ii) rosette size,  
907 including volume (measured by generating a convex hull), (iii) shape, including  
908 flatness and sphericity (the former quantified by  $1 - C/B$  and the latter by  $\sqrt[3]{BC/A^2}$   
909 where  $A$ ,  $B$ , and  $C$  are the principle axes in descending order by magnitude of a  
910 principle components analysis-based ellipsoid fit of cell positions), (iv) and cell  
911 packing (neighbor number determined by Voronoi tessellation(80)). (C)  
912 Representative rosettes are shown in three roughly orthogonal views for size  
913 classes ranging from four to 12 cells/rosette, with the numbers above each image  
914 column indicating the number of cells/rosette. Following previous work (24), we  
915 defined four cells as the smallest number of cells clearly identifiable as a rosette. (D)  
916 Rosettes transition from an early phase of major shape change (dark grey; scaling

917 exponent  $\sim 8$ ) to a later phase of approximately isotropic growth (light grey; scaling  
918 exponent  $\sim 3$ ), as shown by a log-log plot of rosette volume (y-axis) vs. maximum  
919 rosette width (x-axis). **(E)** Rosettes transition from a relatively flat morphology  
920 during the 4-6 cell stage (dark grey; mean flatness  $\cong 0.5 - 0.7$  and mean sphericity  $\cong$   
921  $0.4 - 0.6$ , with flatness = 1.0 perfectly flat and sphericity = 1.0 perfectly spherical) to  
922 a more spheroidal morphology during the 8-12 cell stage (light grey; mean flatness  
923  $\cong 0.2 - 0.3$  and mean sphericity  $\cong 0.7-0.8$ ). **(F)** Packing increases with number of  
924 cells at a decreasing rate. Points on plots D-F represent mean values; error bars  
925 indicate standard error of the mean. N = 100 rosettes, with at least 8 rosettes from  
926 each cell-number class, pooled from three different samples. All scale bars = 3  $\mu\text{m}$ .

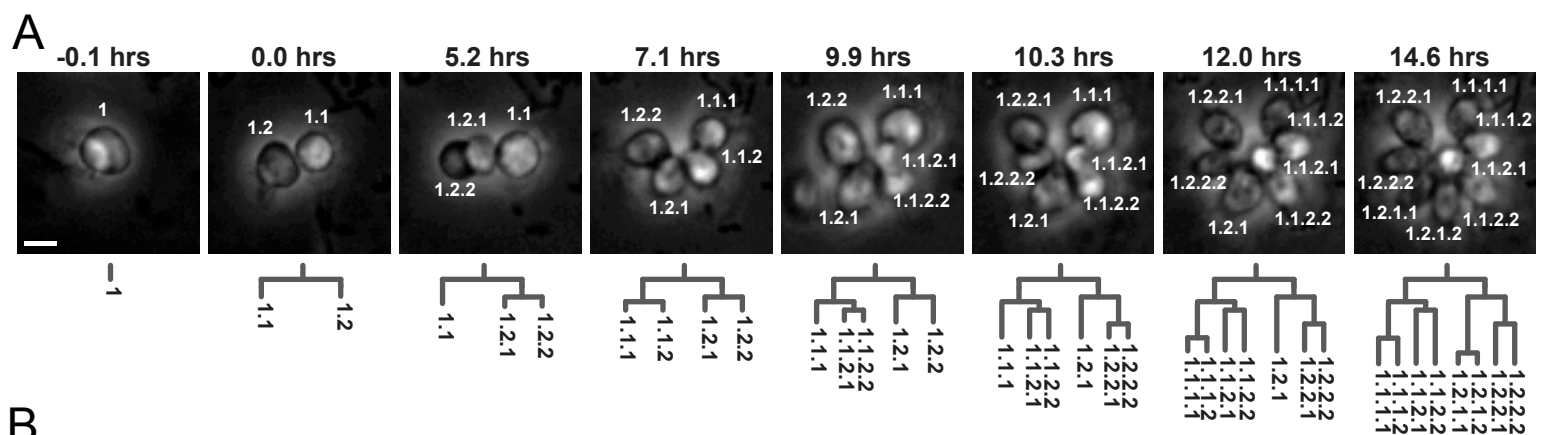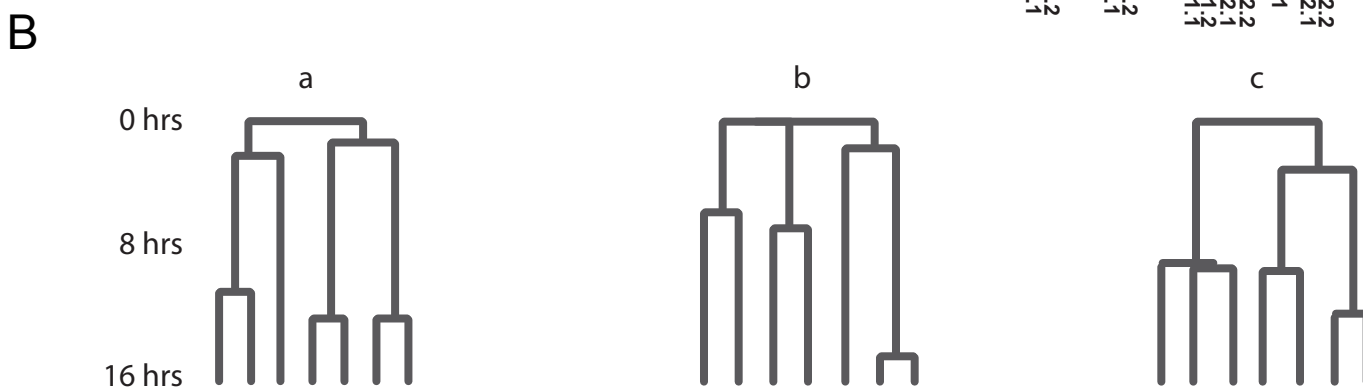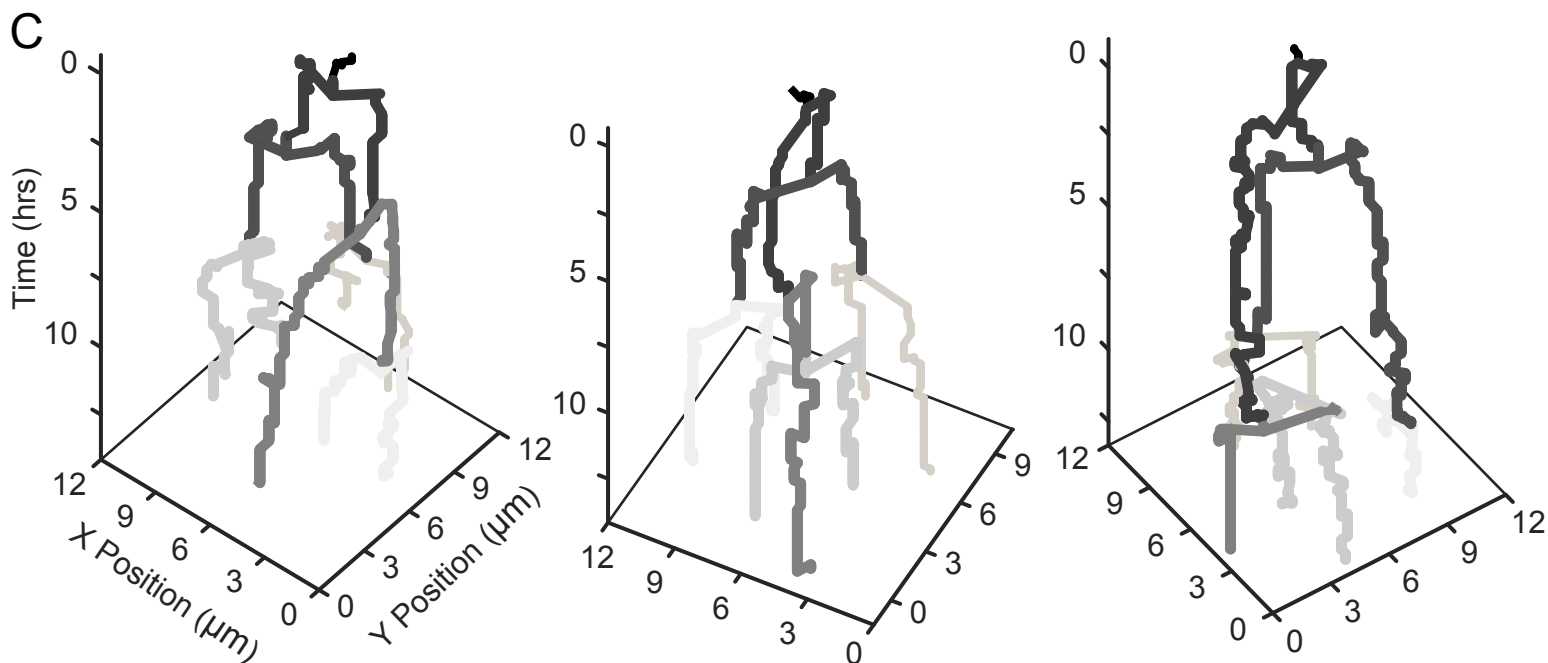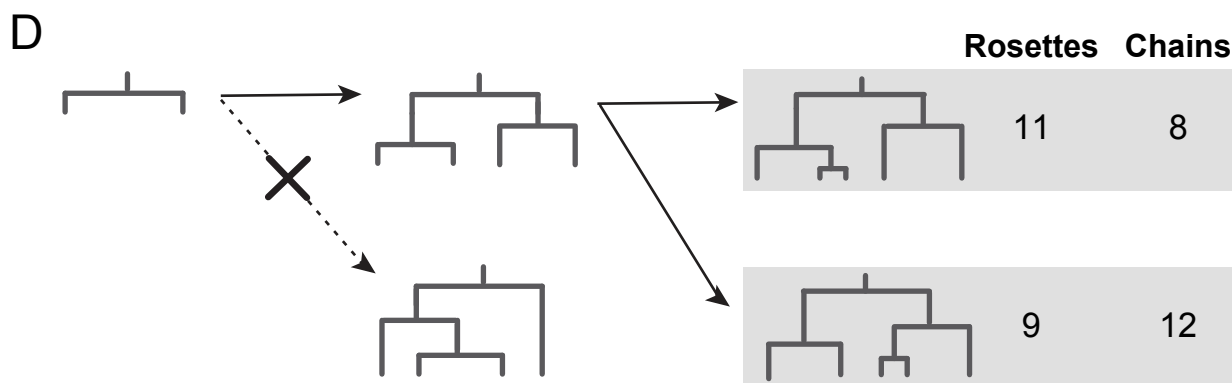



927 **Figure 3. Stochasticity of developmental dynamics revealed by lineage**  
928 **analysis.** (A) Lineage analysis for a representative rosette, imaged live by time lapse  
929 microscopy. Individual daughter cells were marked to record their relationship to  
930 their parent lineage (e.g. 1.1 and 1.2 are daughters of cell 1). Scale bar is 3  $\mu\text{m}$ . (B)  
931 Representative cell lineages during rosette development illustrating differences in  
932 both the order and timing of cell divisions, with the first two on the left having the  
933 same division order but with large differences in division times, and the lineage on  
934 the right showing differences in both division order and timing. Branch lengths scale  
935 with time and are set to zero based on the first division. (C) Lineages a-c from (B)  
936 displayed as space-time plots illustrate cell division variability between rosettes in  
937 both space and time. Plots also demonstrate that cells remain in place after  
938 divisions, with no large rearrangements, moving apart only slightly as they grow.  
939 Colors from dark to light gray indicate the order of cell divisions. (D) Cell lineages  
940 that form during rosette and chain development are balanced, although the specific  
941 times of cell divisions in different lineages and different rosettes or chains can differ.  
942 In rosettes and chains, imbalanced lineage structures (i.e. with significantly different  
943 numbers of cells) were not observed at any stage. Shown here are results for four  
944 and five-cell rosettes and chains. The dashed line with an “x” indicates that this  
945 division pattern was never observed. Furthermore, this uneven branching pattern  
946 was never observed in sub-lineages of any developing chain or rosette. Data were  
947 pooled from three different rosette induction experiments (for rosettes) and three  
948 different experiments with uninduced cells (for chains).

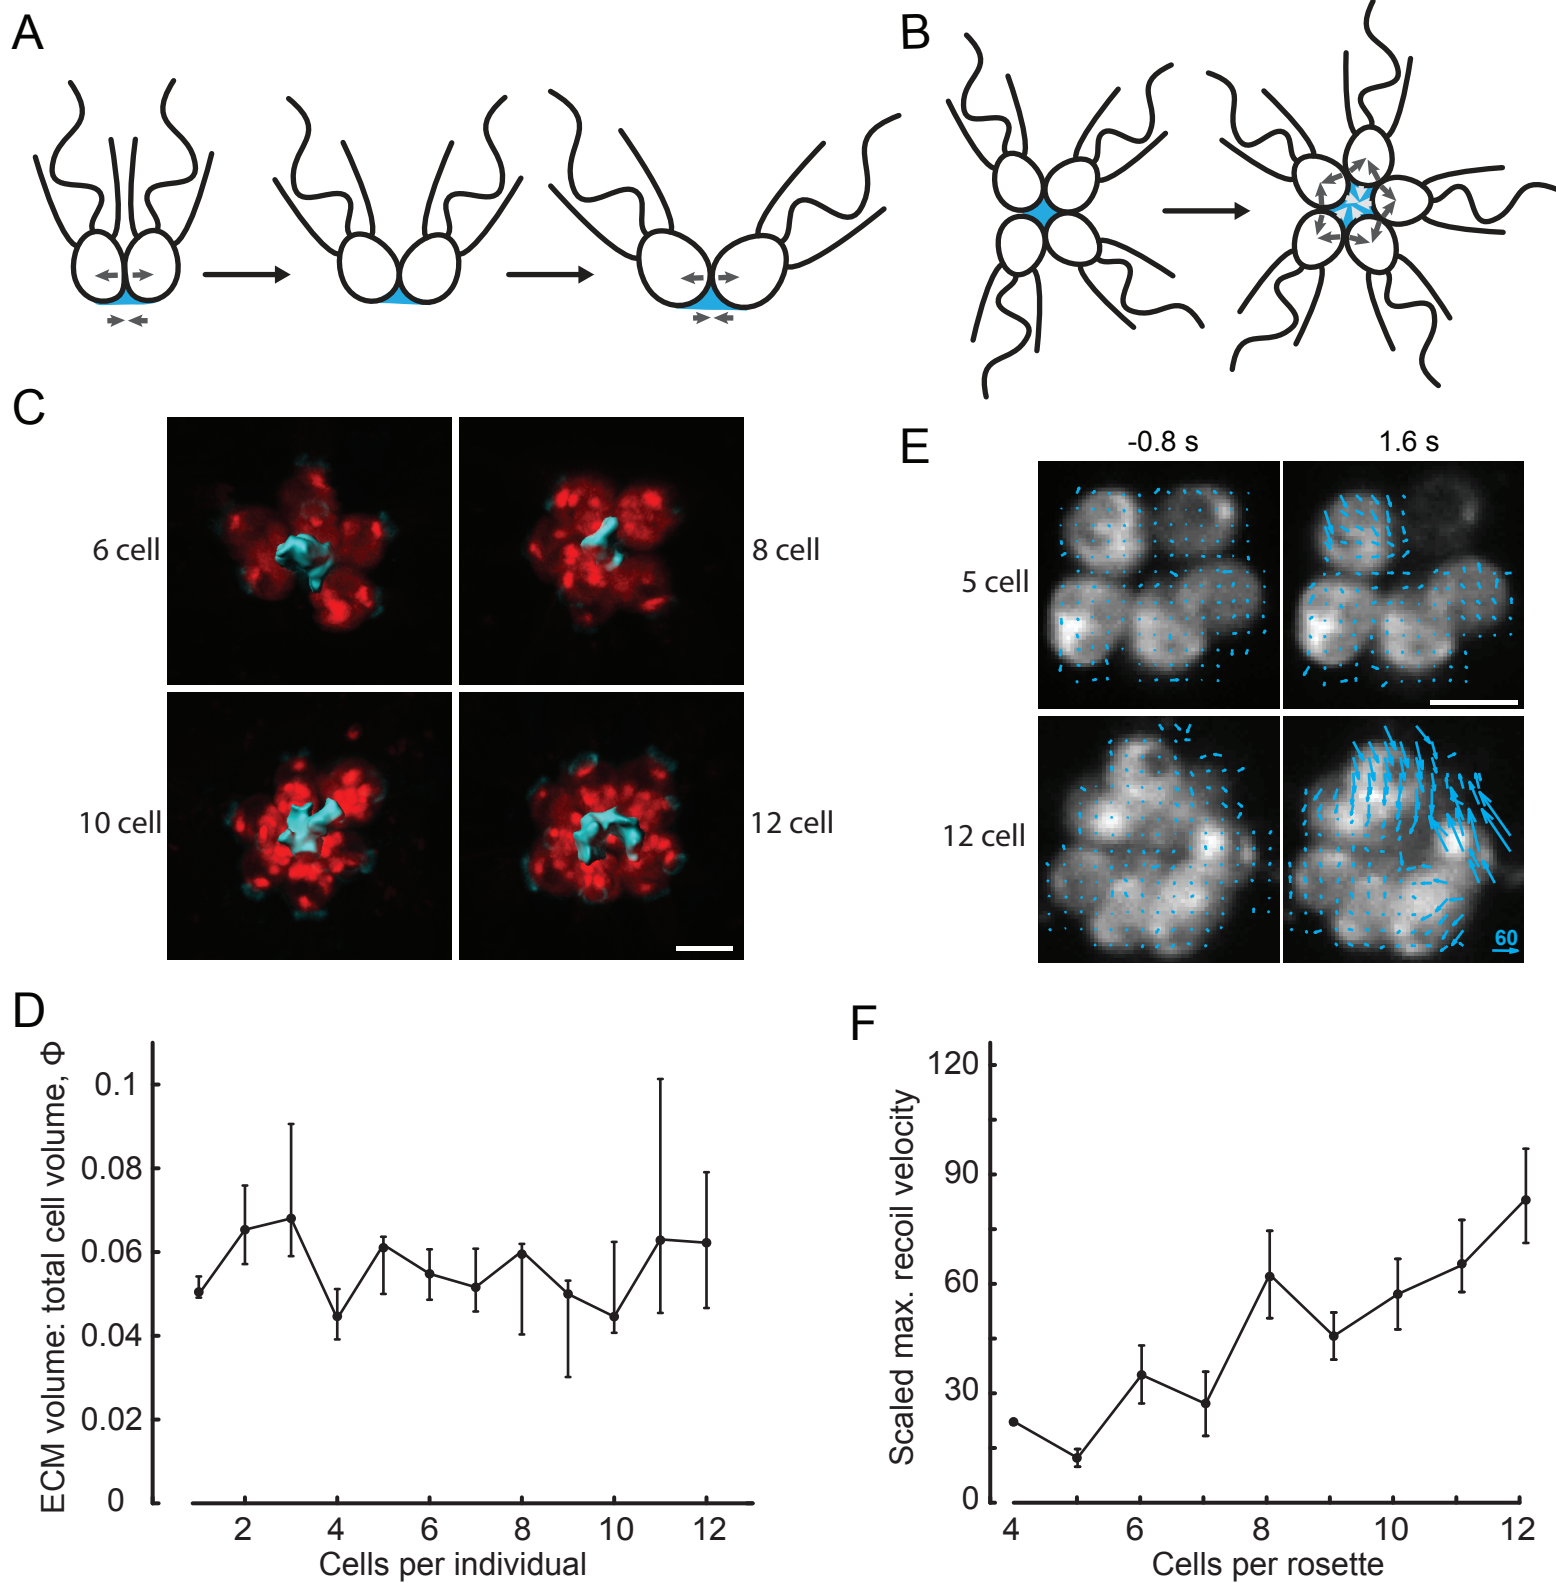

949 **Figure 4. Extracellular matrix constrains proliferating cells during rosette**  
950 **morphogenesis. (A-B)** Cartoons depicting ECM constraint hypothesis. **(A)** As cells  
951 grow, compressive forces exerted on neighboring cells (top set of arrows) may be  
952 balanced by stress in the basally-secreted ECM (blue), which resists deformation  
953 (bottom set of arrows). **(B)** If ECM is limiting, rosettes may undergo a jamming-like  
954 transition and accumulate residual stress as cells continue to grow and divide. **(C)**  
955 Representative images of 4 different rosettes of various sizes (of 6, 7, 8, and 10  
956 cells/rosette ordered from left to right, top to bottom) with ECM tagged using  
957 Jacalin. **(D)** Ratio of total ECM volume to total cell volume as a function of  
958 cells/individual is maintained at a constant level over the course of rosette  
959 development. Points represent mean values, and error bars are bootstrap 95%  
960 confidence intervals. Data were collected from 93 rosettes pooled from two  
961 experiments, with at least 5 rosettes from each size class. Image processing and  
962 analysis proceeded similarly to that described in Fig. 1. **(E)** Laser ablation revealed  
963 increasing stress as a function of cells/rosette. Single cells in rosettes were ablated,  
964 and recoil velocities were measured by particle image velocimetry (PIV). Arrows in  
965 the images indicate the direction and magnitude of the velocity of the recoil as  
966 determined by PIV. Rosettes were found to always close when recoil was observed  
967 (in all cases beyond the 5-cell stage). **(F)** Recoil velocities (rescaled by the length  
968 scale of the average cell diameter of 5  $\mu\text{m}$  and the time scale of the average division  
969 time of 6 hrs.) increased with increasing cells/rosette, indicating increasing stress as  
970 a function of cells/rosette (7, 39, 43). These results are consistent with the ECM  
971 constraint hypothesis and inconsistent with cytoplasmic bridges or cell-cell

972 adhesion as the dominant factors stabilizing rosette structure. Points indicate mean  
973 values; error bars indicate standard error of the mean. Data were collected from 47  
974 rosettes pooled from 3 different rosette inductions, with at least 4 rosettes from  
975 each size class. Scale bars = 5  $\mu\text{m}$ .

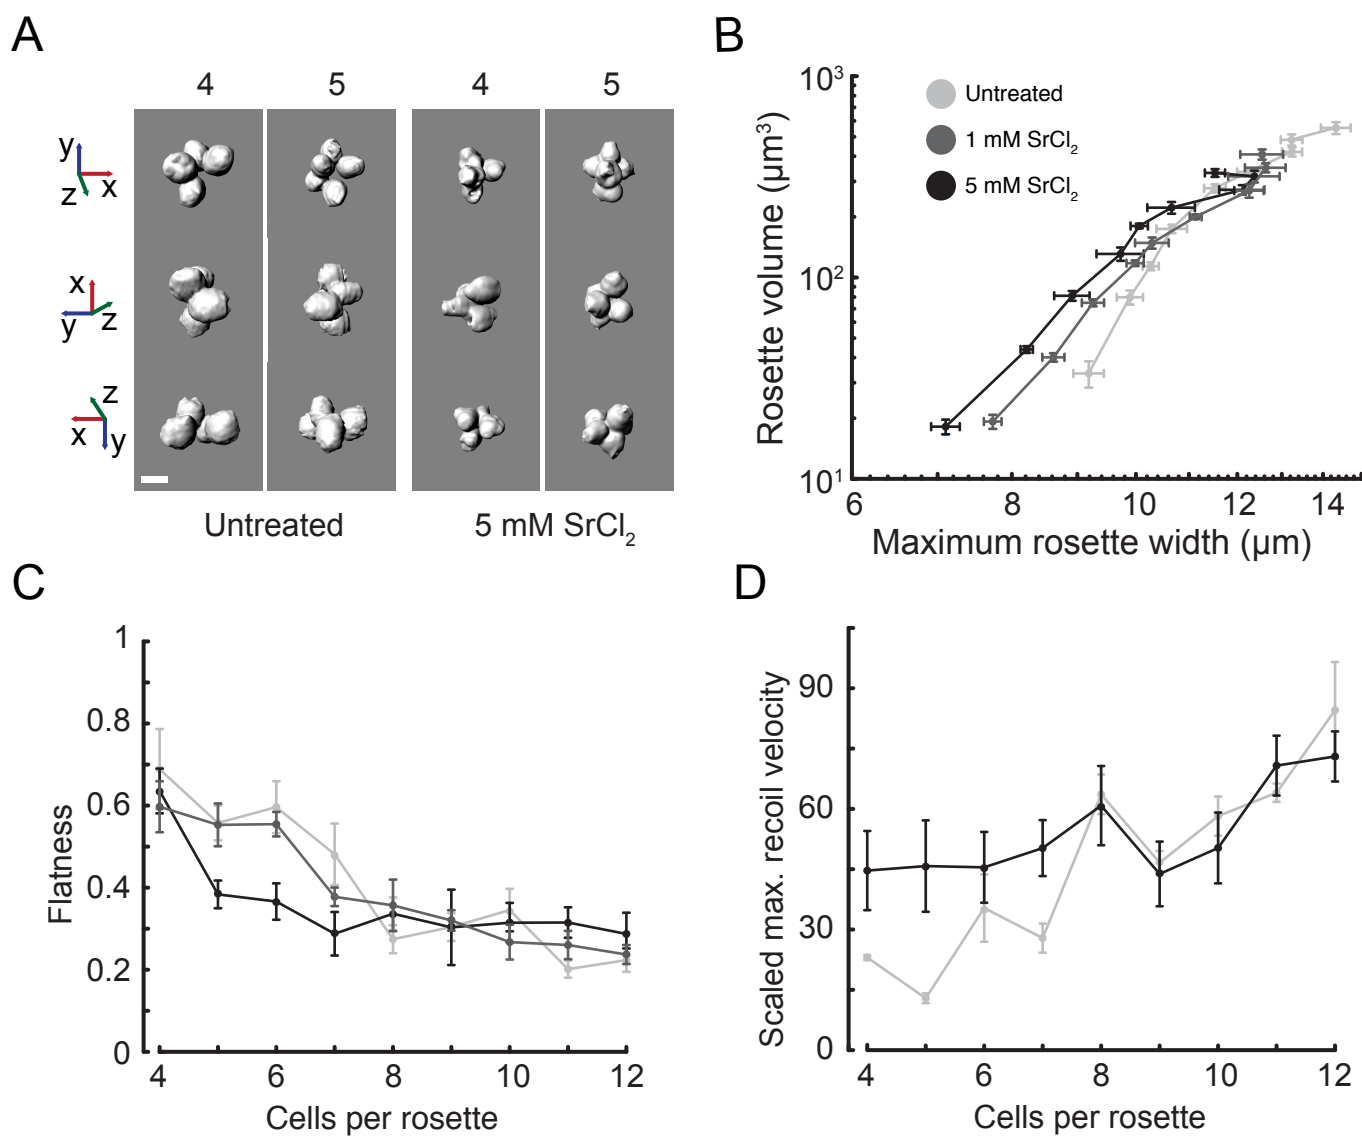

976 **Figure 5. Material properties of the ECM affect morphogenesis, consistent with**  
977 **predictions of the ECM constraint hypothesis.** Treatment of rosettes with SrCl<sub>2</sub>,  
978 which stiffens hydrogels by increasing crosslinking density (44–48), alters rosette  
979 morphogenesis. (A) Representative images of untreated and SrCl<sub>2</sub>-treated rosettes  
980 illustrate the change in rosette morphology. Cells were packed more tightly in SrCl<sub>2</sub>  
981 treated rosettes, leading to differences in rosette size and shape. Scale bar = 4 μm.  
982 (B) The scaling relationship between maximum rosette width and volume revealed  
983 that SrCl<sub>2</sub> abolished the transition to approximately isotropic growth observed in  
984 untreated rosettes. As in Fig. 2D, this is a log-log plot of rosette volume vs. maximum  
985 rosette width, with each point representing average values for a rosette cell-number  
986 class from 4-12 cells/rosette. Error bars are standard error of the mean. This  
987 analysis also revealed that rosettes became increasingly compact with increasing  
988 SrCl<sub>2</sub> concentration. (C) Quantification of rosette flatness (as in Fig. 1), showed that  
989 SrCl<sub>2</sub> shifts the 3D growth transition to lower cell numbers. In the case of the highest  
990 SrCl<sub>2</sub> concentration, the transition occurred by the 5-cell stage. For both (B) and (C),  
991 results were from a total of 100 rosettes pooled from 3 experiments, with at least 8  
992 rosettes for each size class for both SrCl<sub>2</sub> concentrations. (D) Relative residual  
993 stress, as measured by maximum initial recoil velocity (rescaled, as in 4E, F, by the  
994 length scale of the average cell diameter of 5 μm and the time scale of the average  
995 division time of 6 hrs.) after laser ablation of single cells (as in figure 4E, F),  
996 increased in rosettes of 4-7 cells under 5mM SrCl<sub>2</sub> treatment compared to untreated  
997 rosettes. These data demonstrate that increased residual stress is correlated with  
998 altered cell packing and hence, altered rosette morphology. Points represent means

999 and error bars represent standard error of the mean from 41 total measurements  
1000 pooled from two experiments, with at least 4 rosettes from each size class.

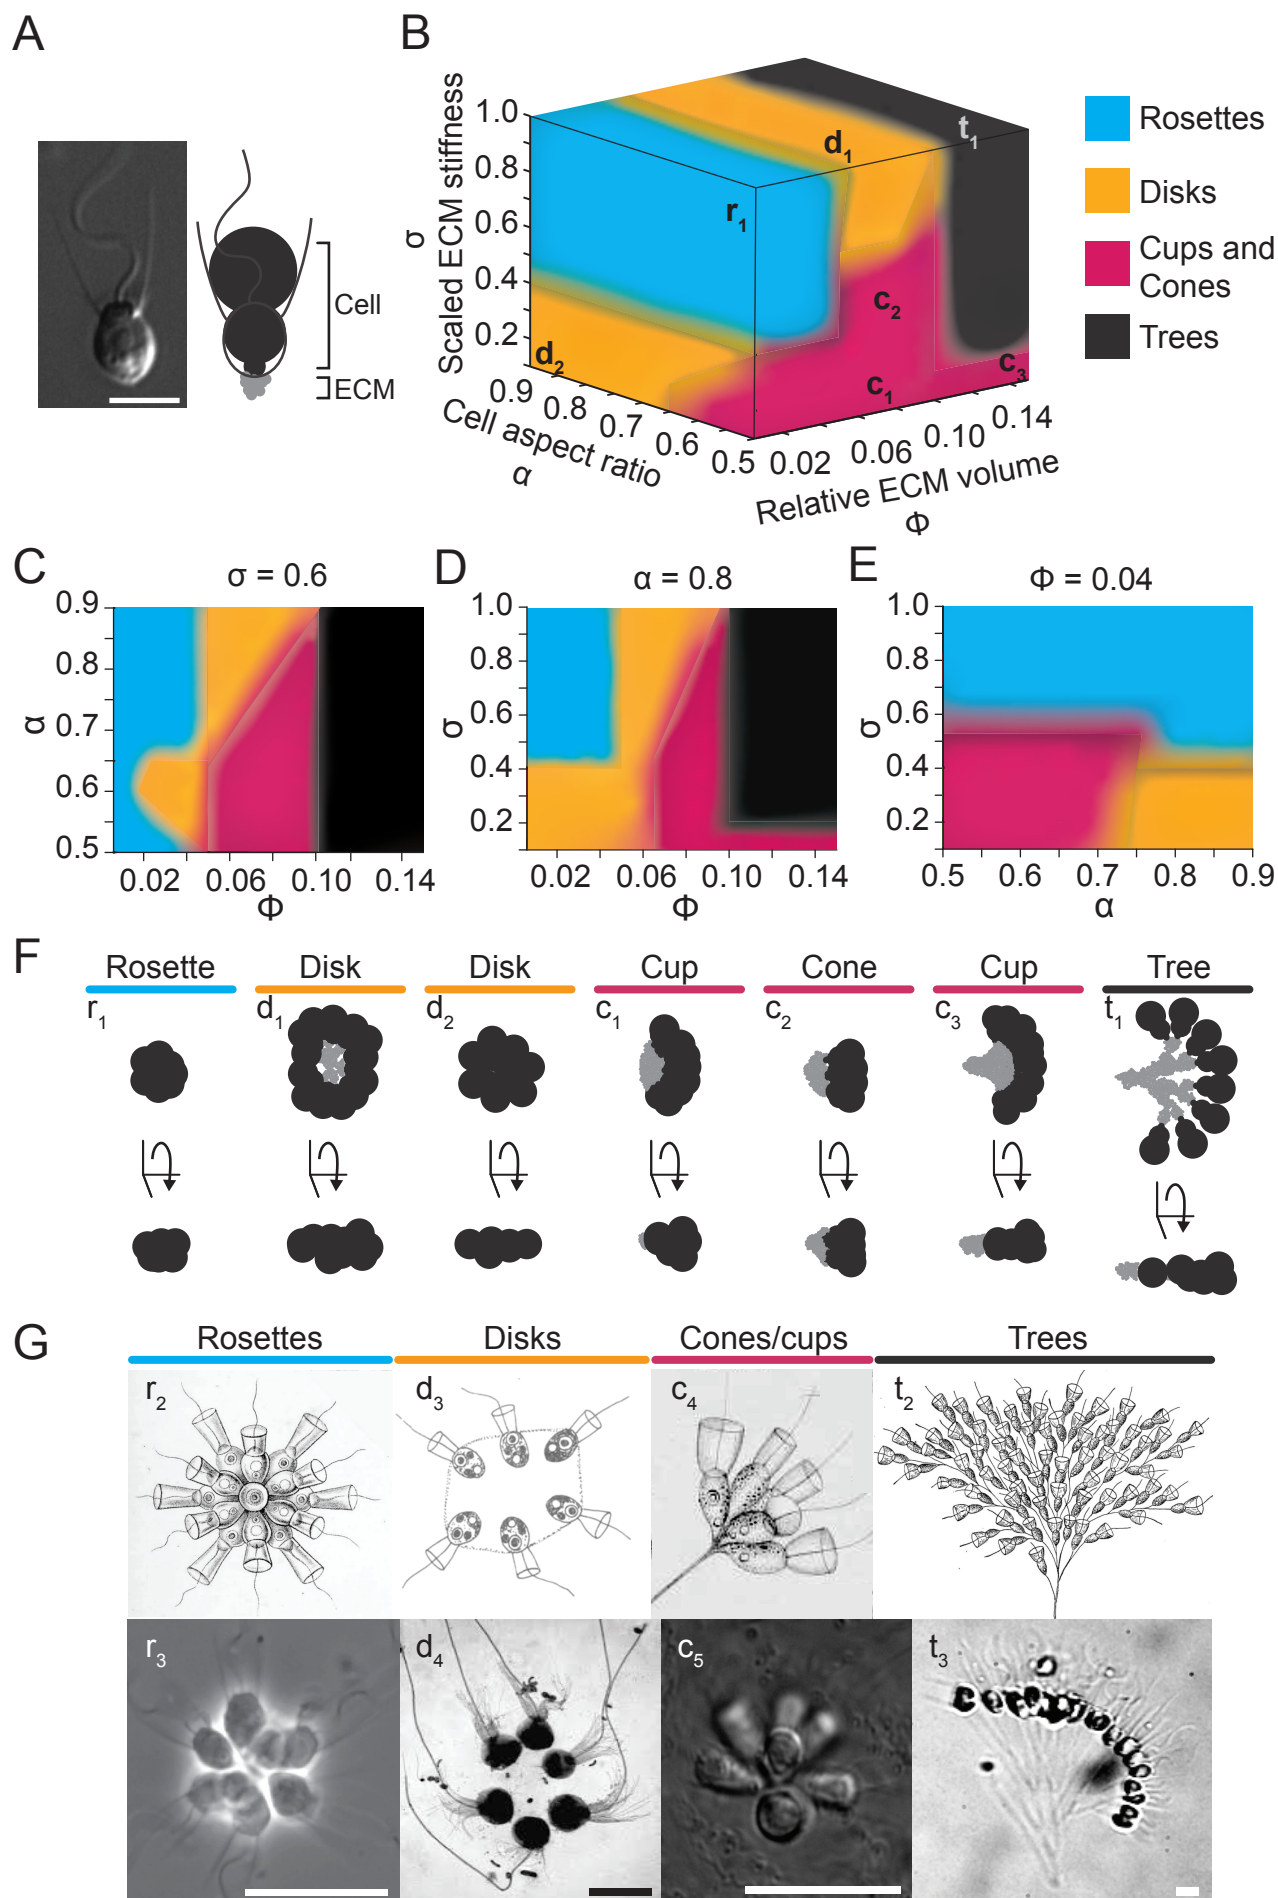



1001 **Figure 6. A simple model shows that amount of ECM, cell shape (aspect ratio),**  
1002 **and ECM stiffness tune multicellular morphogenesis.** The model incorporates  
1003 simple cellular and physical interactions, including ECM secretion and cell division,  
1004 cell-cell steric interactions, and ECM adhesion. Three main parameters describe the  
1005 system: cell aspect ratio,  $\alpha$ , scaled ECM stiffness,  $\sigma$ , and relative ECM volume,  $\phi$ . **(A)**  
1006 An image of a choanoflagellate (adapted from (16)) next to a simulation snapshot to  
1007 illustrate how cell geometry is modeled by three linked spheres (black) and ECM is  
1008 modeled by small spheres (grey) secreted at the basal pole of cells. In the model,  
1009 cells interact sterically with one another, and ECM spheres have adhesive  
1010 interactions with one another and with basal cell particles. Scale bar = 5  $\mu\text{m}$ . **(B)** The  
1011 morphospace of ECM-based colonial morphologies generated by simulations can be  
1012 broken into four regions: rosettes, disks, cones/cups, and trees as denoted by colors  
1013 as indicated in the legend. The lower-case letters indicate approximately the point in  
1014 the morphospace occupied by the corresponding simulated colony in panel F. **(C-E)**  
1015 Orthogonal planes through the displayed morphospace, with the parameter of fixed  
1016 value noted above each plot, illustrate how changing two parameters while keeping  
1017 the third fixed affects morphology. Colors indicate morphological classification as in  
1018 panel B. **(C)** Scaled ECM stiffness is constant ( $\sigma=0.6$ ). **(D)** Cell aspect ratio is constant  
1019 ( $\alpha=0.8$ ). **(E)** Relative ECM volume is constant ( $\phi=0.04$ ). **(F)** Representative simulated  
1020 colonies for each of the regions are displayed in two orthogonal views ( $\mathbf{r}_1$ =rosette  
1021 with  $\alpha=0.7$ ,  $\sigma=0.8$ , and  $\phi=0.04$ ;  $\mathbf{d}_1$ =disk with  $\alpha=0.75$ ,  $\sigma=0.85$ , and  $\phi=0.075$ ;  $\mathbf{d}_2$ =disk  
1022 with  $\alpha=0.8$ ,  $\sigma=0.15$ , and  $\phi=0.02$ ;  $\mathbf{c}_1$ =cone with  $\alpha=0.55$ ,  $\sigma=0.5$ , and relative ECM  
1023 volume=0.08;  $\mathbf{c}_2$ =cup with  $\alpha=0.6$ ,  $\sigma=0.2$ , and  $\phi=0.09$ ;  $\mathbf{c}_3$ =cup with  $\alpha=0.9$ ,  $\sigma=0.12$ , and

1024  $\phi=0.13$ ; and  $\mathbf{t}_1$ =tree with  $\alpha=0.65$ ,  $\sigma=0.9$ , and  $\phi=0.12$ ). Note that  $\mathbf{d}_2$  and  $\mathbf{c}_3$  represent  
1025 extreme ends of the morphospace to better illustrate, along with the other  
1026 representative simulation snapshots, how changing the model parameters affects  
1027 the simulated morphologies. **(G)** Simulated colonial morphologies are reminiscent  
1028 of morphologies of colonial choanoflagellates found in nature. **(r<sub>2</sub>)** *Codosiga*  
1029 *botrytis* (86). **(r<sub>3</sub>)** *Salpingoeca rosetta* (87). **(d<sub>3</sub>)** *Proterospongia haeckelii* (88) (Ertl  
1030 after Lackey). **(d<sub>4</sub>)** *Salpingoeca amphoridium* (10). **(c<sub>4</sub>)** *Codosiga umbellata* (53). **(c<sub>5</sub>)**  
1031 Uncharacterized environmental isolate collected from Mono Lake by Daniel Richter,  
1032 *Salpingoeca* sp. **(t<sub>2</sub>)** *Codosiga cymosa* (52) (Calkins after Kent). **(t<sub>3</sub>)** Uncharacterized  
1033 environmental isolate from a tide pool in Curaçao, *Salpingoeca* sp. Scale bars = 10  
1034  $\mu\text{m}$ .
